# Supplementary material for: Dissociative electron attachment to halogenated nucleotides: a quest for better radiosensitizers
Source: Royal Society of Chemistry journal article supplement (doi:10.1039/d4cp02258k), 2024-01-01
Supplement: d4cp02258k1.pdf [file d4cp02258k1.pdf]

## *Supporting Information*

# Dissociative electron attachment to the halogenated nucleotides: A quest for better radiosensitizer

Shubham Kumar and Manabendra Sarma\*

*Department of Chemistry, Indian Institute of Technology Guwahati, Assam-781039*

E-mail: [msarma@iitg.ac.in](mailto:msarma@iitg.ac.in)

## Table of Contents

|     |                                                                                                                                                                                                                                                                                           |     |
|-----|-------------------------------------------------------------------------------------------------------------------------------------------------------------------------------------------------------------------------------------------------------------------------------------------|-----|
| 1.  | Electron affinities of the 5X-3'-dCMPH (X = H, F, Cl, Br, I) moieties calculated at the B3LYP/ aug-cc-pVDZ level of theory in the gas phase and aqueous phase.                                                                                                                            | S3  |
| 2.  | Bond length of dissociative C <sub>5</sub> -X bonds of the 5X-3'-dCMPH (X = H, F, Cl, Br, I) moieties before and after electron attachment calculated at the B3LYP/ aug-cc-pVDZ level of theory in the gas phase and aqueous phase.                                                       | S4  |
| 3.  | Natural population analysis (NPA) charge distribution along the C <sub>3</sub> '-O <sub>3</sub> ' and C-N bond cleavage pathways calculated at the M06-2X/ aug-cc-pVDZ level of theory in the aqueous phase.                                                                              | S4  |
| 4.  | Molecular orbital pictures of anionic structures in the ground state, transition states, and products of different DEA processes calculated at the M06-2X/ aug-cc-pVDZ level of theory in the aqueous phase.                                                                              | S5  |
| 5.  | Activation energies, reaction energies and rate constants for C <sub>5</sub> -X, C <sub>3</sub> '-O <sub>3</sub> ', and C-N bond cleavage pathways calculated at the B3LYP/ aug-cc-pVDZ level of theory in the aqueous phase.                                                             | S6  |
| 6.  | Potential energy curves (PECs) for different DEA processes calculated at the B3LYP/ aug-cc-pVDZ level of theory in the aqueous phase.                                                                                                                                                     | S8  |
| 7.  | Intrinsic reaction coordinates (IRCs) for different DEA processes calculated at the M06-2X/ aug-cc-pVDZ level of theory in the aqueous phase.                                                                                                                                             | S10 |
| 8.  | Time evolution of the C <sub>5</sub> -X, C <sub>3</sub> '-O <sub>3</sub> ', and the C-N bonds, along with singly occupied molecular orbitals, at regular intervals during ab initio molecular dynamics simulations calculated at the B3LYP/def2-SVP level of theory in the aqueous phase. | S11 |
| 9.  | Cartesian coordinates of neutral 5X-3'-dCMPH moieties optimized at the M06-2X/ aug-cc-pVDZ level of theory in the aqueous phase.                                                                                                                                                          | S16 |
| 10. | Cartesian coordinates of anionic 5X-3'-dCMPH moieties optimized at the M06-2X/ aug-cc-pVDZ level of theory in the aqueous phase.                                                                                                                                                          | S22 |
| 11. | Cartesian coordinates transition states for C <sub>5</sub> -X bond cleavage calculated at the M06-2X / aug-cc-pVDZ level of theory in the aqueous phase.                                                                                                                                  | S29 |
| 12. | Cartesian coordinates of transition states for C <sub>3</sub> '-O <sub>3</sub> ' bond cleavage calculated at the M06-2X/ aug-cc-pVDZ level of theory in the aqueous phase.                                                                                                                | S34 |
| 13. | Cartesian coordinates of transition states for C-N bond cleavage calculated at the M06-2X/ aug-cc-pVDZ level of theory in the aqueous phase.                                                                                                                                              | S41 |
| 14. | Cartesian coordinates of products for the C <sub>5</sub> -X bond cleavage calculated at the M06-2X/ aug-cc-pVDZ level of theory in the aqueous phase.                                                                                                                                     | S48 |
| 15. | Cartesian coordinates of products for the C <sub>3</sub> '-O <sub>3</sub> ' bond cleavage calculated at the M06-2X/ aug-cc-pVDZ level of theory in the aqueous phase.                                                                                                                     | S53 |
| 16. | Cartesian coordinates of products for the C-N bond cleavage calculated at the M06-2X/ aug-cc-pVDZ level of theory in the aqueous phase.                                                                                                                                                   | S60 |

**1. Electron affinities of the 5X-3'-dCMPH (X = H, F, Cl, Br, I) moieties calculated at the B3LYP/ aug-cc-pVDZ level of theory in the gas phase and aqueous phase.**

**Table S1:** Vertical electron affinity (VEA), adiabatic electron affinity (AEA), and vertical detachment energy (VDE) calculated at the B3LYP/aug-cc-pVDZ level of theory in the gas phase. (All the energies are in eV).

| System              | VEA  | AEA  | VDE  |
|---------------------|------|------|------|
| <b>3'-dCMPH</b>     | 0.18 | 0.49 | 1.04 |
| <b>5F-3'-dCMPH</b>  | 0.05 | 0.72 | 1.44 |
| <b>5Cl-3'-dCMPH</b> | 0.08 | 0.80 | 1.51 |
| <b>5Br-3'-dCMPH</b> | 0.08 | 0.83 | 1.59 |
| <b>5I-3'-dCMPH</b>  | 0.09 | 0.88 | 1.74 |

**Table S2:** Vertical electron affinity (VEA), adiabatic electron affinity (AEA), and vertical detachment energy (VDE) calculated at the B3LYP/aug-cc-pVDZ level of theory in the aqueous phase. (All the energies are in eV).

| System              | VEA  | AEA  | VDE  |
|---------------------|------|------|------|
| <b>3'-dCMPH</b>     | 1.47 | 2.08 | 2.45 |
| <b>5F-3'-dCMPH</b>  | 1.68 | 2.30 | 2.78 |
| <b>5Cl-3'-dCMPH</b> | 1.75 | 2.34 | 2.82 |
| <b>5Br-3'-dCMPH</b> | 1.75 | 2.36 | 2.91 |
| <b>5I-3'-dCMPH</b>  | 1.73 | 2.38 | 2.90 |

**2. Bond length of dissociative C<sub>5</sub>–X bonds of the 5X-3'-dCMPH (X = H, F, Cl, Br, I) moieties before and after electron attachment calculated at the B3LYP/ aug-cc-pVDZ level of theory in the gas phase and aqueous phase.**

**Table S3:** C<sub>5</sub>–X bond length of neutral and anionic 5X-3'-dCMPH at equilibrium geometries calculated at the B3LYP/aug-cc-pVDZ level of theory.

| System              | Gas Phase |       | Aqueous Phase |       |
|---------------------|-----------|-------|---------------|-------|
|                     | Neutral   | Anion | Neutral       | Anion |
| <b>3'-dCMPH</b>     | 1.087     | 1.090 | 1.086         | 1.090 |
| <b>5F-3'-dCMPH</b>  | 1.367     | 1.391 | 1.363         | 1.387 |
| <b>5Cl-3'-dCMPH</b> | 1.761     | 1.788 | 1.757         | 1.782 |
| <b>5Br-3'-dCMPH</b> | 1.943     | 1.986 | 1.938         | 1.986 |
| <b>5I-3'-dCMPH</b>  | 2.119     | 2.170 | 2.116         | 2.170 |

**3. Natural population analysis (NPA) charge distributions along the C<sub>3'</sub>–O<sub>3'</sub> and C-N bond cleavage pathways calculated at the M06-2X/ aug-cc-pVDZ level of theory in the aqueous phase.**

**Table S4:** Natural Population Analysis (NPA) charge distributions on the base fragment (B), sugar fragment (S), and phosphate group (P) of reactants, transition states, and products along the C<sub>3'</sub>–O<sub>3'</sub> bond-cleavage pathway calculated at the M06-2X/aug-cc-pVDZ level of theory in the aqueous phase.

| System              | Reactant |      |       | Transition State |      |       | Product |      |       |
|---------------------|----------|------|-------|------------------|------|-------|---------|------|-------|
|                     | B        | S    | P     | B                | S    | P     | B       | S    | P     |
| <b>3'-dCMPH</b>     | -1.19    | 0.56 | -0.37 | -0.30            | 0.38 | -1.08 | -0.33   | 0.31 | -0.98 |
| <b>5F-3'-dCMPH</b>  | -1.20    | 0.57 | -0.36 | -0.31            | 0.39 | -1.08 | -0.34   | 0.32 | -0.98 |
| <b>5Cl-3'-dCMPH</b> | -1.21    | 0.57 | -0.36 | -0.32            | 0.40 | -1.08 | -0.34   | 0.32 | -0.98 |
| <b>5Br-3'-dCMPH</b> | -1.21    | 0.57 | -0.36 | -0.32            | 0.40 | -1.08 | -0.35   | 0.33 | -0.98 |
| <b>5I-3'-dCMPH</b>  | -1.21    | 0.57 | -0.36 | -0.32            | 0.40 | -1.08 | -0.35   | 0.33 | -0.98 |



**Table S5:** Natural Population Analysis (NPA) charge distributions on the base fragment (B), sugar fragment (S), and phosphate group (P) of reactants, transition states, and products along the C-N bond-cleavage pathway calculated at the M06-2X/aug-cc-pVDZ level of theory in the aqueous phase.

| System              | Reactant |      |       | Transition State |      |       | Product |      |       |
|---------------------|----------|------|-------|------------------|------|-------|---------|------|-------|
|                     | B        | S    | P     | B                | S    | P     | B       | S    | P     |
| <b>3'-dCMPH</b>     | -1.19    | 0.56 | -0.37 | -1.03            | 0.40 | -0.37 | -0.98   | 0.34 | -0.36 |
| <b>5F-3'-dCMPH</b>  | -1.20    | 0.57 | -0.36 | -1.06            | 0.42 | -0.36 | -0.98   | 0.34 | -0.36 |
| <b>5Cl-3'-dCMPH</b> | -1.21    | 0.57 | -0.36 | -1.08            | 0.44 | -0.36 | -0.98   | 0.34 | -0.36 |
| <b>5Br-3'-dCMPH</b> | -1.21    | 0.57 | -0.36 | -1.08            | 0.44 | -0.36 | -0.98   | 0.34 | -0.36 |
| <b>5I-3'-dCMPH</b>  | -1.21    | 0.57 | -0.36 | -1.07            | 0.44 | -0.36 | -0.98   | 0.34 | -0.36 |

**4. Molecular orbital pictures of neutral and anionic structures in ground state, transition states, and products of different DEA processes calculated at the M06-2X/ aug-cc-pVDZ level of theory in the aqueous phase.**

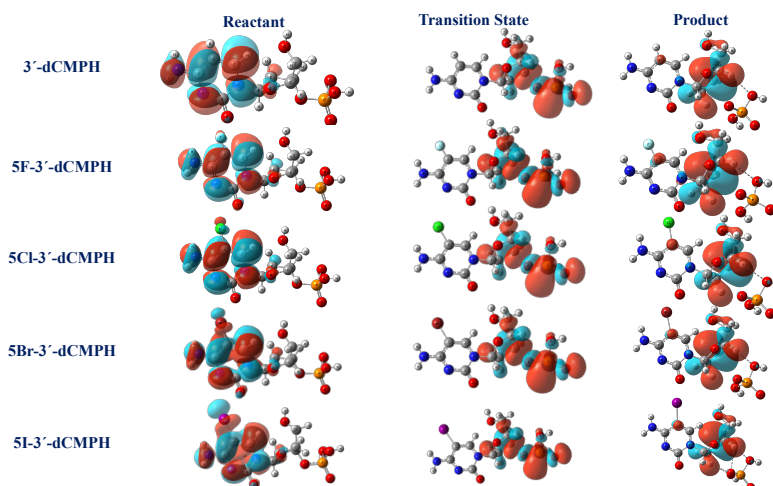

**Fig. S1:** The singly occupied molecular orbitals (SOMOs) of reactants, transition states, and products for anionic 5X-3'-dCMPH (X = F, Cl, Br, I) along the C<sub>3'</sub>-O<sub>3'</sub> bond cleavage calculated at the M06-2X/aug-cc- pVDZ level of theory in the aqueous phase.

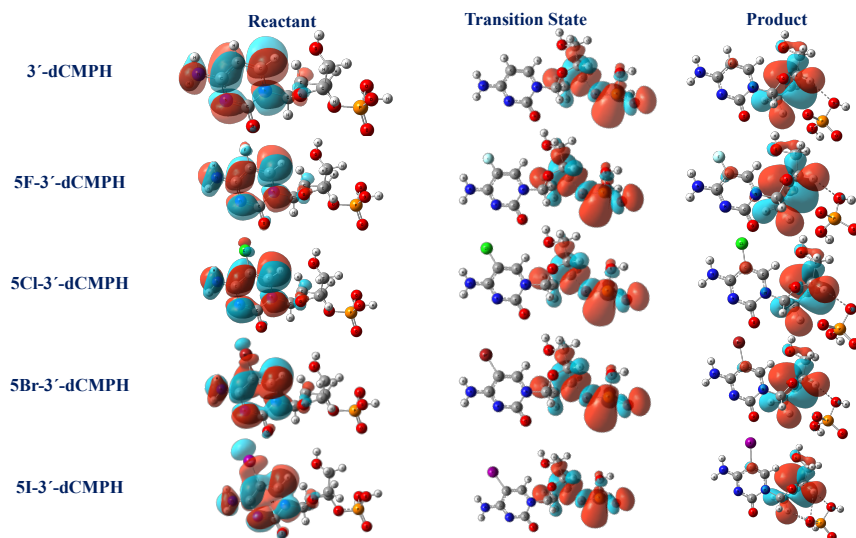

**Fig. S2:** The singly occupied molecular orbitals (SOMOs) of reactants, transition states, and products for anionic 5X-3'-dCMPH (X = F, Cl, Br, I) along the C<sub>3'</sub>-O<sub>3'</sub> bond cleavage calculated at the M06-2X/aug-cc-pVDZ level of theory in the aqueous phase.

**5. Activation energies, reaction energies and rate constants for C<sub>5</sub>-X, C<sub>3'</sub>-O<sub>3'</sub>, and C-N bond cleavage pathways calculated at the B3LYP/ aug-cc-pVDZ level of theory in the aqueous phase.**

**Table S6:** Activation energies ( $E^\ddagger$ ) and activation free energies ( $G^\ddagger$ ) for dehalogenation, single-strand break, and base release calculated at the B3LYP/aug-cc-pVDZ level of theory in the aqueous phase. (All the energies are in kcal/mol.)

| System              | C <sub>5</sub> -X bond cleavage |              | C <sub>3'</sub> -O <sub>3'</sub> bond cleavage |              | C-N bond cleavage |              |
|---------------------|---------------------------------|--------------|------------------------------------------------|--------------|-------------------|--------------|
|                     | $E^\ddagger$                    | $G^\ddagger$ | $E^\ddagger$                                   | $G^\ddagger$ | $E^\ddagger$      | $G^\ddagger$ |
| <b>3'-dCMPH</b>     | --                              | --           | 14.56                                          | 12.80        | 22.96             | 22.84        |
| <b>5F-3'-dCMPH</b>  | 11.79                           | 12.11        | 16.32                                          | 13.99        | 24.28             | 23.78        |
| <b>5Cl-3'-dCMPH</b> | 3.51                            | 3.89         | 16.57                                          | 14.18        | 24.09             | 23.91        |
| <b>5Br-3'-dCMPH</b> | 0.06                            | 0.37         | 16.82                                          | 14.31        | 23.84             | 23.78        |
| <b>5I-3'-dCMPH</b>  | 0.0                             | --           | 17.44                                          | 14.06        | 24.59             | 23.53        |

**Table S7:** The reaction energies ( $E_r$ ) and the reaction free energies ( $G_r$ ) for dehalogenation, single-strand break, and base release calculated at the B3LYP/aug-cc-pVDZ level of theory in the aqueous phase. (All the energies are in kcal/mol.)

| System              | C <sub>5</sub> -X bond cleavage |        | C <sub>3'</sub> -O <sub>3'</sub> bond cleavage |        | C-N bond cleavage |       |
|---------------------|---------------------------------|--------|------------------------------------------------|--------|-------------------|-------|
|                     | $E_r$                           | $G_r$  | $E_r$                                          | $G_r$  | $E_r$             | $G_r$ |
| <b>3'-dCMPH</b>     | --                              | --     | -21.52                                         | -26.42 | 2.1               | 5.14  |
| <b>5F-3'-dCMPH</b>  | -3.57                           | -4.89  | -16.44                                         | -21.46 | 5.21              | 6.15  |
| <b>5Cl-3'-dCMPH</b> | -14.12                          | -15.75 | -15.49                                         | -19.89 | -0.75             | 5.27  |
| <b>5Br-3'-dCMPH</b> | -17.51                          | -18.57 | -14.99                                         | -20.02 | 4.95              | 5.33  |
| <b>5I-3'-dCMPH</b>  | --                              | --     | -14.74                                         | -21.33 | 5.71              | 5.02  |

**Table S8:** Rate Constants,  $k_{TST}$  (in s<sup>-1</sup>) calculated with Eyring's equation from B3LYP/aug-cc-pVDZ optimized structures for dehalogenation, strand break, base release.

| System       | C <sub>5</sub> -X bond cleavage |                        | C <sub>3'</sub> -O <sub>3'</sub> bond cleavage |                        | C-N bond cleavage      |                        |
|--------------|---------------------------------|------------------------|------------------------------------------------|------------------------|------------------------|------------------------|
|              | $k_{TST}$                       | $k_{SC}$               | $k_{TST}$                                      | $k_{SC}$               | $k_{TST}$              | $k_{SC}$               |
| 3'-dCMPH     | —                               | —                      | $3.13 \times 10^{+03}$                         | $2.59 \times 10^{+04}$ | $1.12 \times 10^{-04}$ | $3.47 \times 10^{-03}$ |
| 5F-3'-dCMPH  | $8.24 \times 10^{+03}$          | $2.37 \times 10^{+04}$ | $4.47 \times 10^{+02}$                         | $2.96 \times 10^{+03}$ | $2.29 \times 10^{-05}$ | $6.46 \times 10^{-02}$ |
| 5Cl-3'-dCMPH | $8.74 \times 10^{+09}$          | $1.06 \times 10^{+10}$ | $3.03 \times 10^{+02}$                         | $1.93 \times 10^{+03}$ | $1.86 \times 10^{-05}$ | $3.66 \times 10^{-05}$ |
| 5Br-3'-dCMPH | $3.29 \times 10^{+12}$          | $3.05 \times 10^{+12}$ | $2.05 \times 10^{+02}$                         | $1.30 \times 10^{+03}$ | $2.29 \times 10^{-05}$ | $8.88 \times 10^{-02}$ |
| 5I-3'-dCMPH  | $6.21 \times 10^{+12}$          | —                      | $3.03 \times 10^{+02}$                         | $2.02 \times 10^{+03}$ | $3.50 \times 10^{-05}$ | $8.88 \times 10^{-02}$ |

6. Potential energy curves (PECs) for different DEA processes calculated at the B3LYP/ aug-cc-pVDZ level of theory in the aqueous phase.

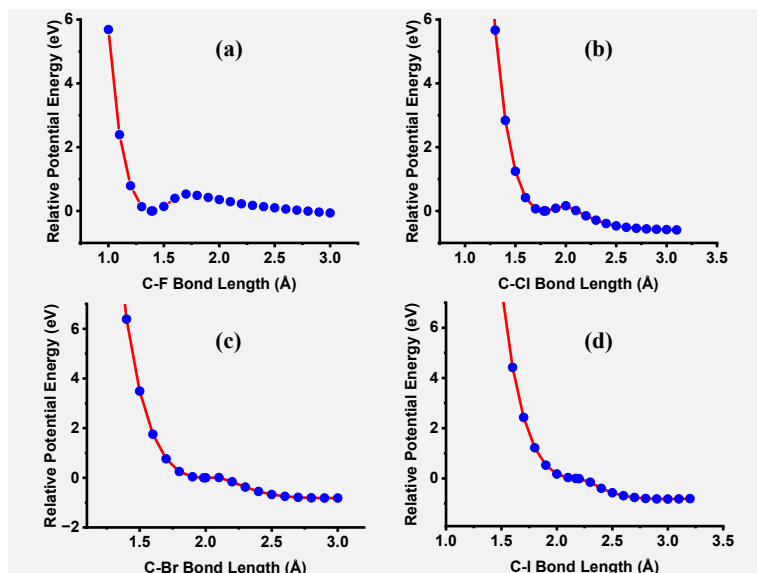

**Fig. S3:** The relaxed potential energy curves (PECs) for the anionic (a) 5F-3'-dCMPH, (b) 5Cl-3'-dCMPH, (c) 5Br-3'-dCMPH, and (d) 5I-3'-dCMPH along the C<sub>5</sub>-X bond calculated at the B3LYP/aug-cc-pVDZ level of theory in the aqueous phase.

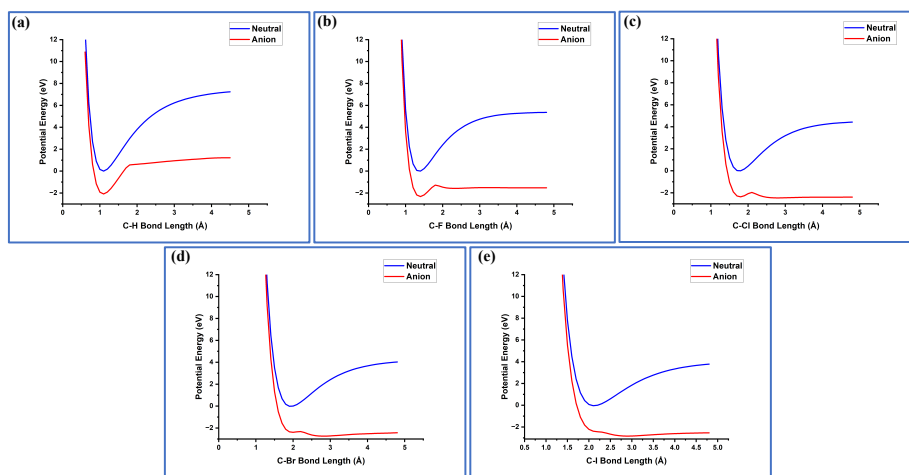

**Fig. S4:** The rigid potential energy curves (PECs) for the C<sub>5</sub>-X bond cleavage in both neutral and anionic forms of (a) 3'-dCMPH, (b) 5F-3'-dCMPH, (c) 5Cl-3'-dCMPH, (d) 5Br-3'-dCMPH, and (e) 5I-3'-dCMPH calculated at the B3LYP/aug-cc-pVDZ level of theory in the aqueous phase.

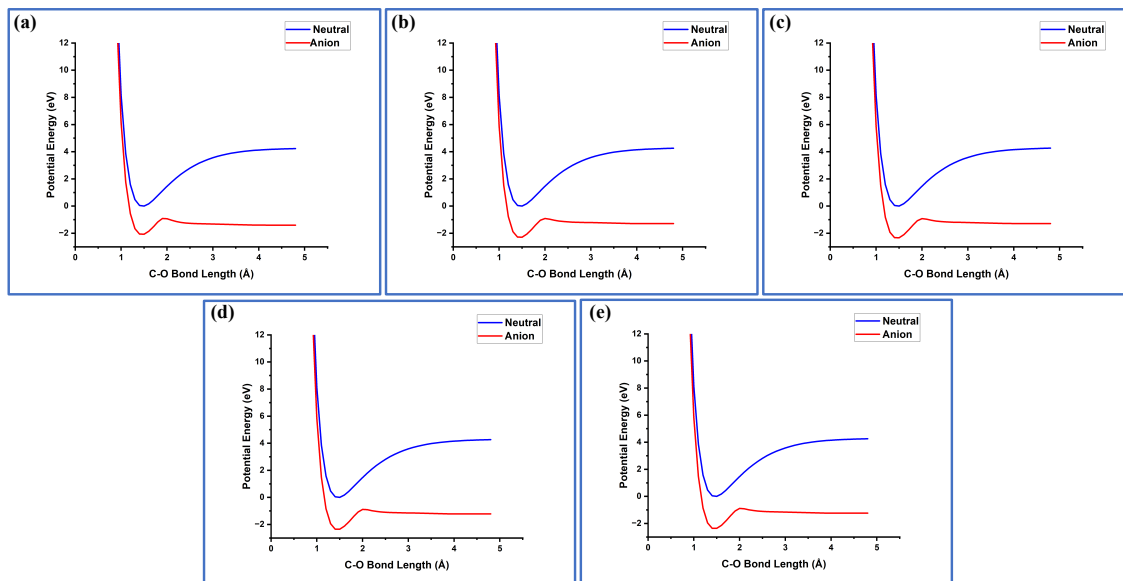

**Fig. S5:** The rigid potential energy curves (PECs) for the  $C_3'-O_3'$  bond cleavage in both neutral and anionic forms of (a) 3'-dCMPH, (b) 5F-3'-dCMPH, (c) 5Cl-3'-dCMPH, (d) 5Br-3'-dCMPH, and (e) 5I-3'-dCMPH calculated at the B3LYP/aug-cc-pVDZ level of theory in the aqueous phase.

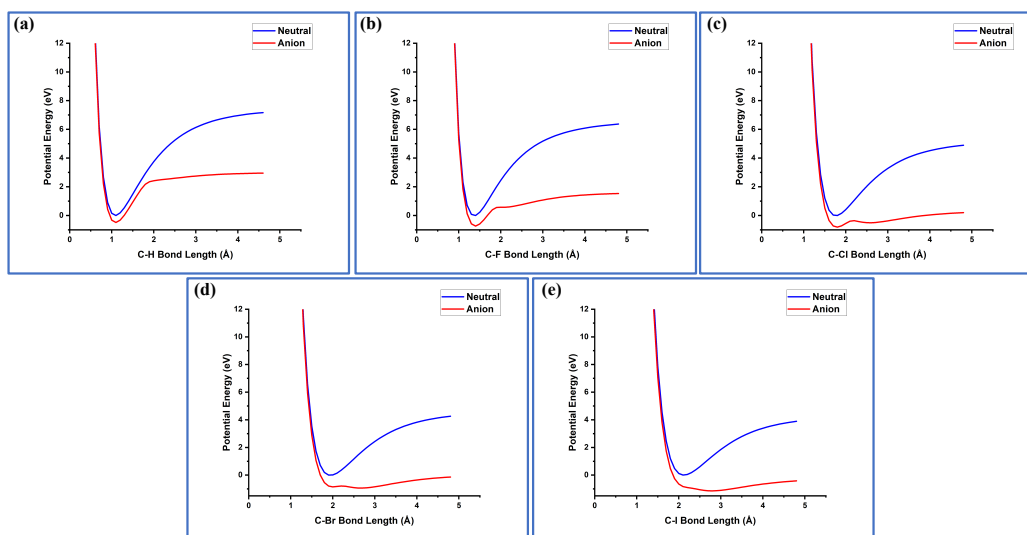

**Fig. S6:** The rigid potential energy curves (PECs) for the C-N bond cleavage in both neutral and anionic forms of (a) 3'-dCMPH, (b) 5F-3'-dCMPH, (c) 5Cl-3'-dCMPH, (d) 5Br-3'-dCMPH, and (e) 5I-3'-dCMPH calculated at the B3LYP/aug-cc-pVDZ level of theory in the aqueous phase.

7. Intrinsic reaction coordinates (IRCs) for different DEA processes calculated at the M06-2X/ aug-cc-pVDZ level of theory in the aqueous phase.

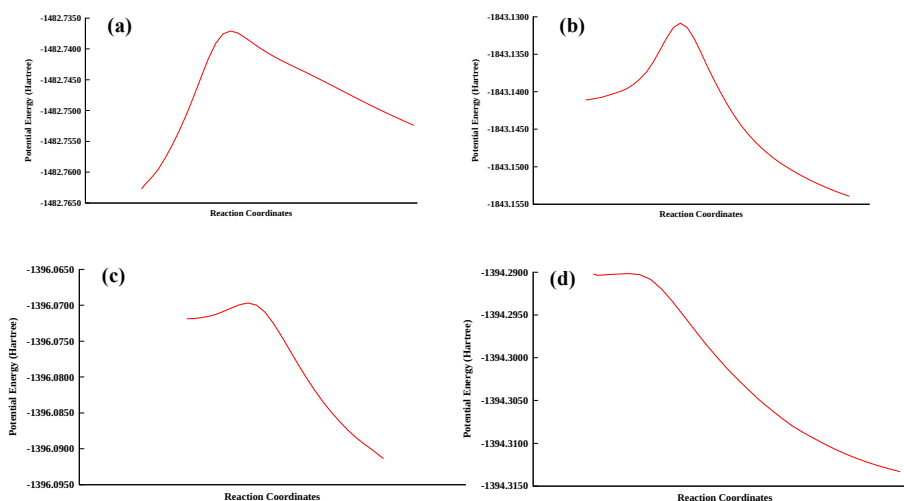

**Fig. S7:** The intrinsic reaction coordinate (IRC) profiles for the C<sub>5</sub>-X bond cleavage of anionic (a) 5F-3'-dCMPH, (b) 5Cl-3'-dCMPH, (c) 5Br-3'-dCMPH and (d) 5I-3'-dCMPH calculated at the B3LYP/aug-cc-pVDZ level of theory in the aqueous phase.

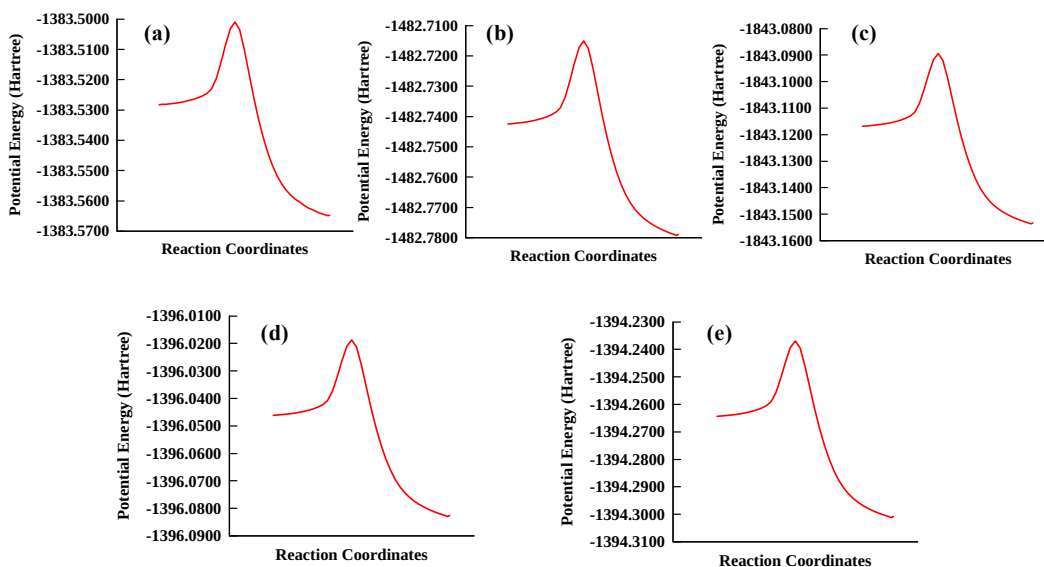

**Fig. S8:** The intrinsic reaction coordinate (IRC) profiles for the C<sub>3</sub>-O<sub>3'</sub> bond cleavage of anionic (a) 3'-dCMPH, (b) 5F-3'-dCMPH, (c) 5Cl-3'-dCMPH, (d) 5Br-3'-dCMPH, and (e) 5I-3'-dCMPH calculated at the B3LYP/aug-cc-pVDZ level of theory in the aqueous phase.

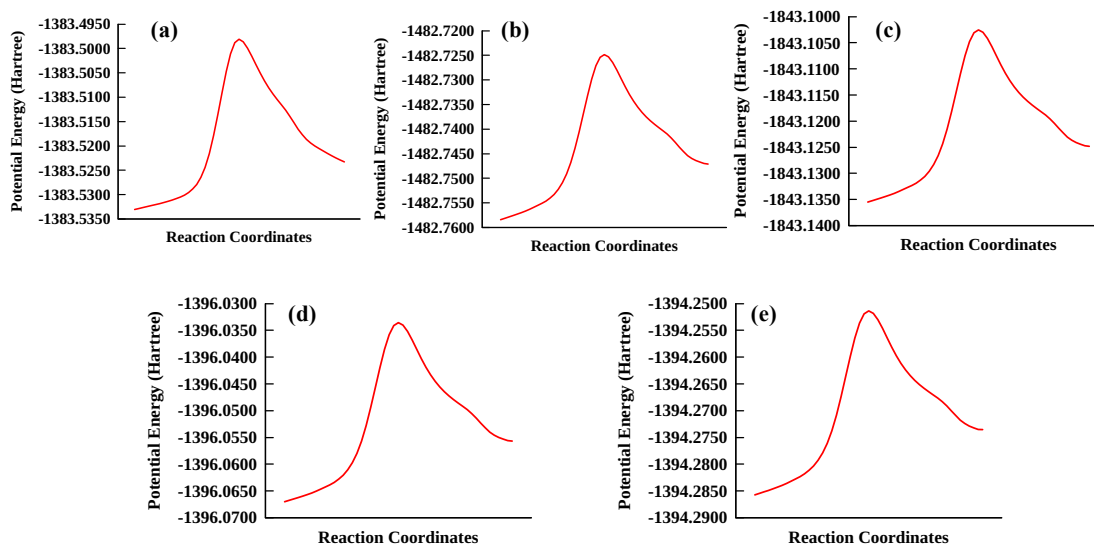

**Fig. S9:** The intrinsic reaction coordinate (IRC) profiles for the C-N bond cleavage of anionic (a) 3'-dCMPH, (b) 5F-3'-dCMPH, (c) 5Cl-3'-dCMPH, (d) 5Br-3'-dCMPH, and (e) 5I-3'-dCMPH calculated at the B3LYP/aug-cc-pVDZ level of theory in the aqueous phase.

**8. Time evolution of the C<sub>5</sub>-X, C<sub>3'</sub>-O<sub>3'</sub>, and the C-N bonds, along with singly occupied molecular orbitals, at regular intervals during ab initio molecular dynamics simulations calculated at the B3LYP/def2-SVP level of theory in the aqueous phase.**

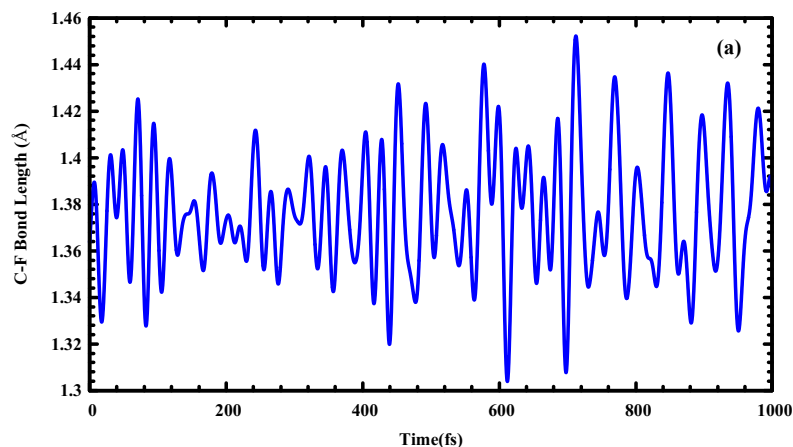

**Fig. S10:** The time evolution of the C<sub>5</sub>-F bond, after the electron attachment to the neutral geometry of 5F-3'-dCMPH, during ab initio molecular dynamics simulation calculated at the B3LYP/def2-SVP level of theory in the aqueous phase.

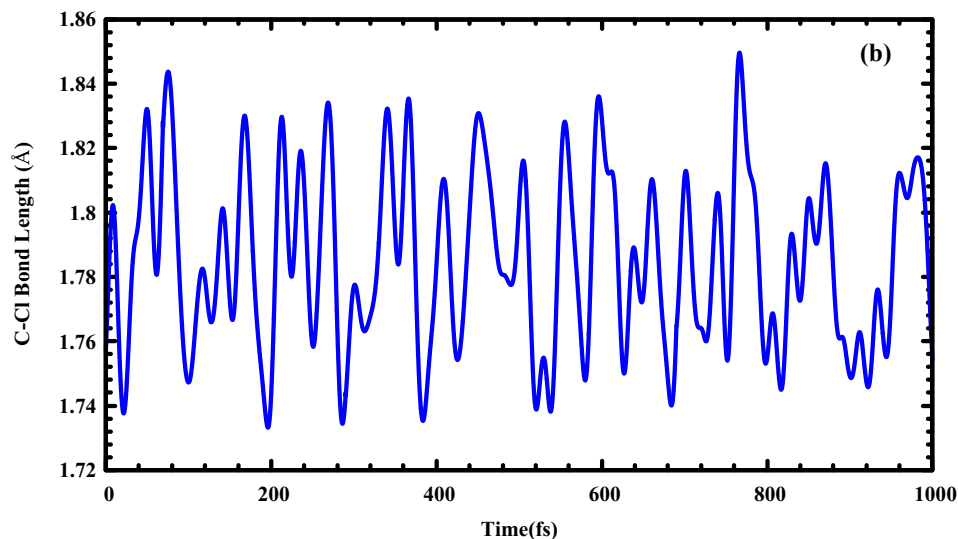

**Fig. S11:** The time evolution of the  $C_5$ -Cl bond, after the electron attachment to the neutral geometry of 5Cl-3'-dCMPH, during ab initio molecular dynamics simulation calculated at the B3LYP/def2-SVP level of theory in the aqueous phase.

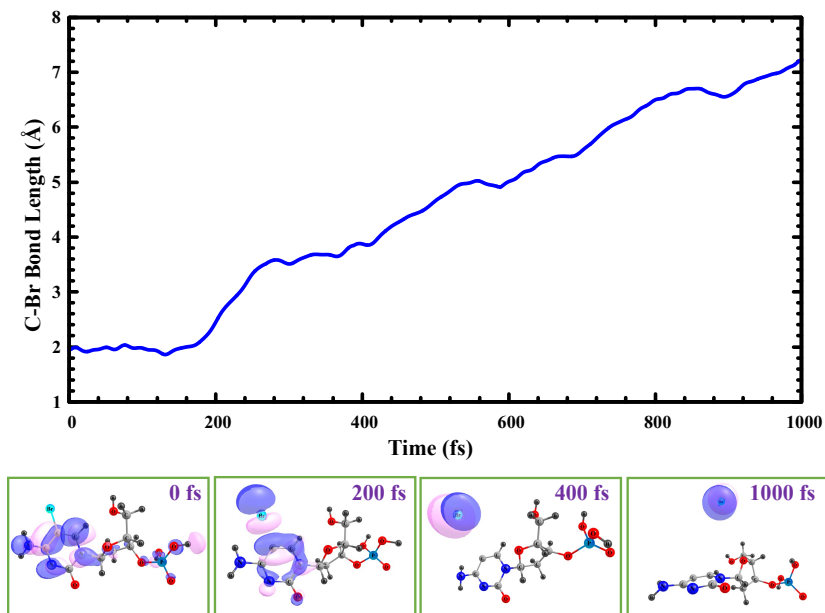

**Fig. S12:** The time evolution of the  $C_5$ -Br bond length, along with singly occupied molecular orbitals (SOMOs) at time = 0 fs, 200 fs, 400 fs, and 1000 fs during ab initio molecular dynamics simulation calculated at the B3LYP/def2-SVP level of theory in the aqueous phase.



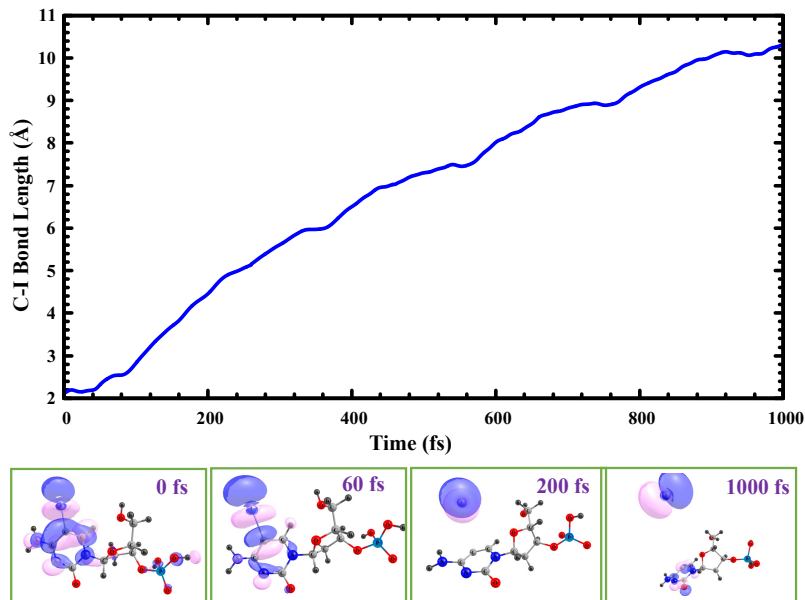

**Fig. S13:** The time evolution of the  $C_5-I$  bond length, along with singly occupied molecular orbitals (SOMOs) at time = 0 fs, 60 fs, 200 fs, and 1000 fs during ab initio molecular dynamics simulation calculated at the B3LYP/def2-SVP level of theory in the aqueous phase.

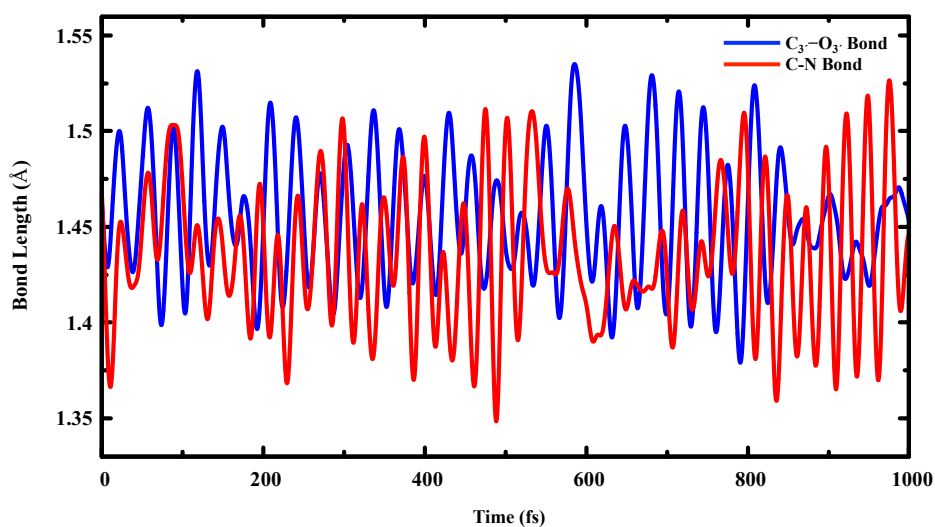

**Fig. S14:** The time evolution of the  $C_{3'}-O_{3'}$  bond (blue line) and the C-N bond (red line), after the electron attachment to the neutral geometry of 5F-3'-dCMPH.

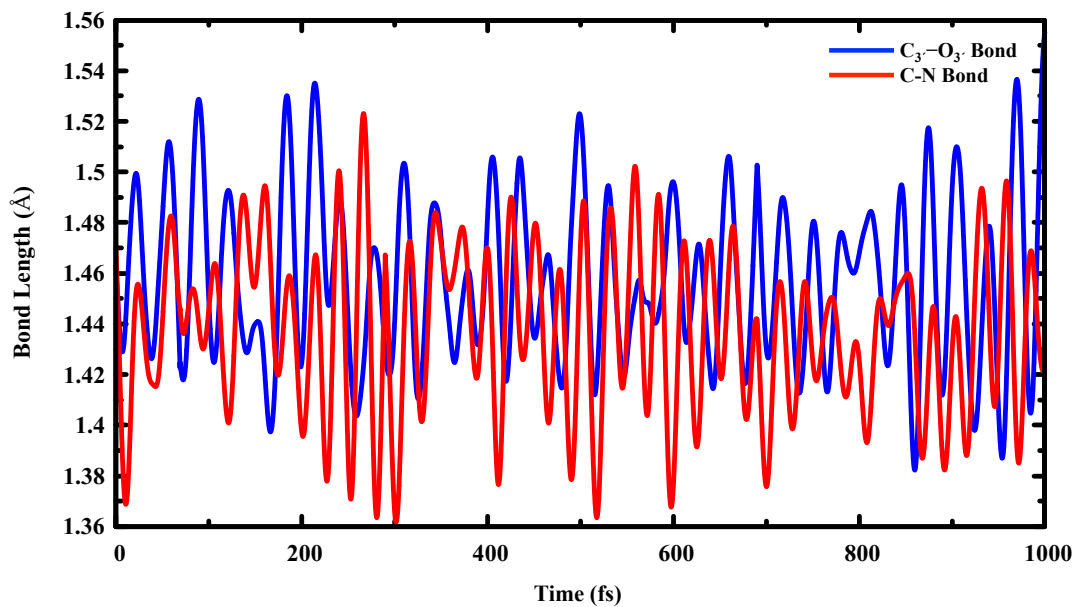

**Fig. S12:** The time evolution of the C<sub>3'</sub>-O<sub>3'</sub> bond (blue line) and the C-N bond (red line), after the electron attachment to the neutral geometry of 5Cl-3'-dCMPH.

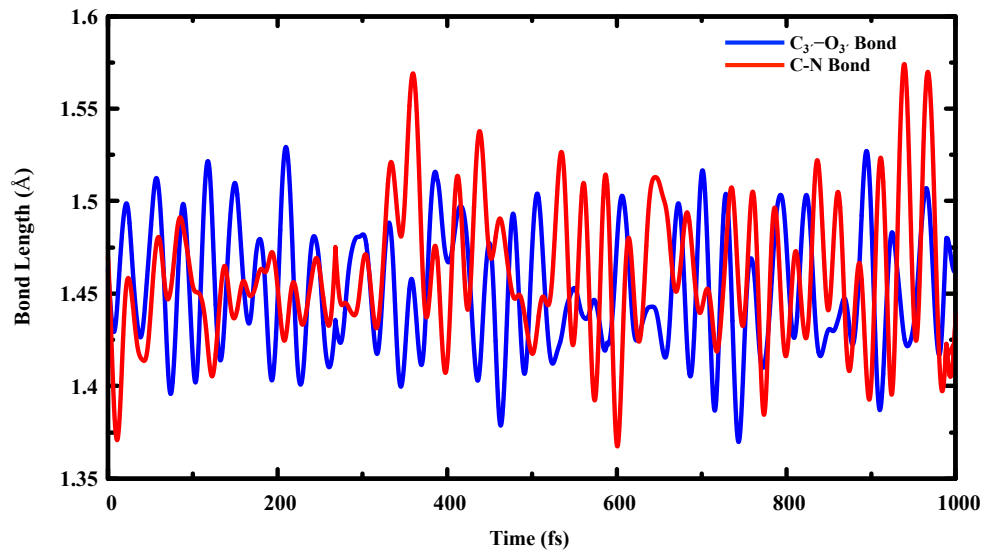

**Fig. S13:** The time evolution of the C<sub>3'</sub>-O<sub>3'</sub> bond (blue line) and the C-N bond (red line), after the electron attachment to the neutral geometry of 5Br-3'-dCMPH.

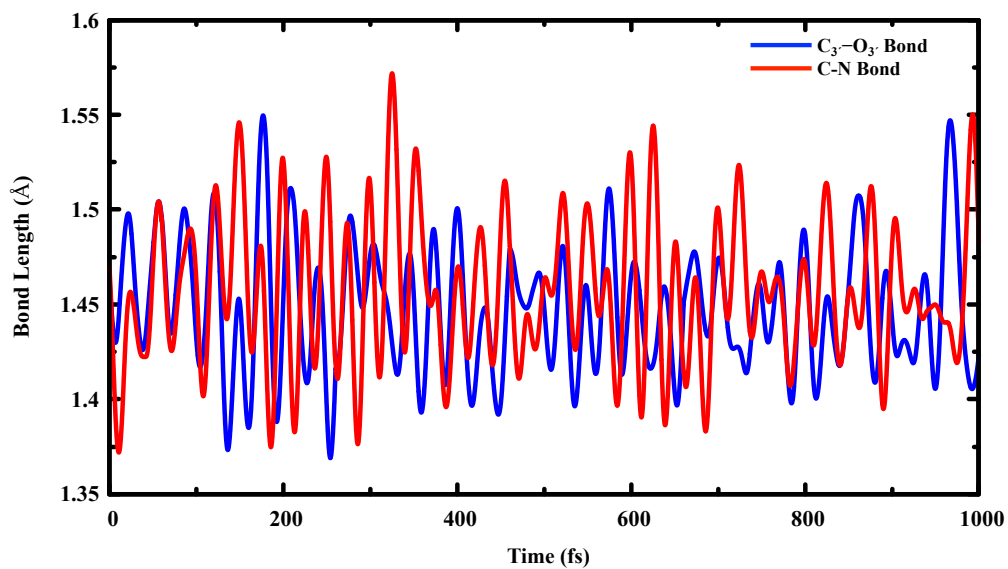

**Fig. S14:** The time evolution of the  $C_{3'}-O_{3'}$  bond (blue line) and the C-N bond (red line), after the electron attachment to the neutral geometry of 5I-3'-dCMPH.

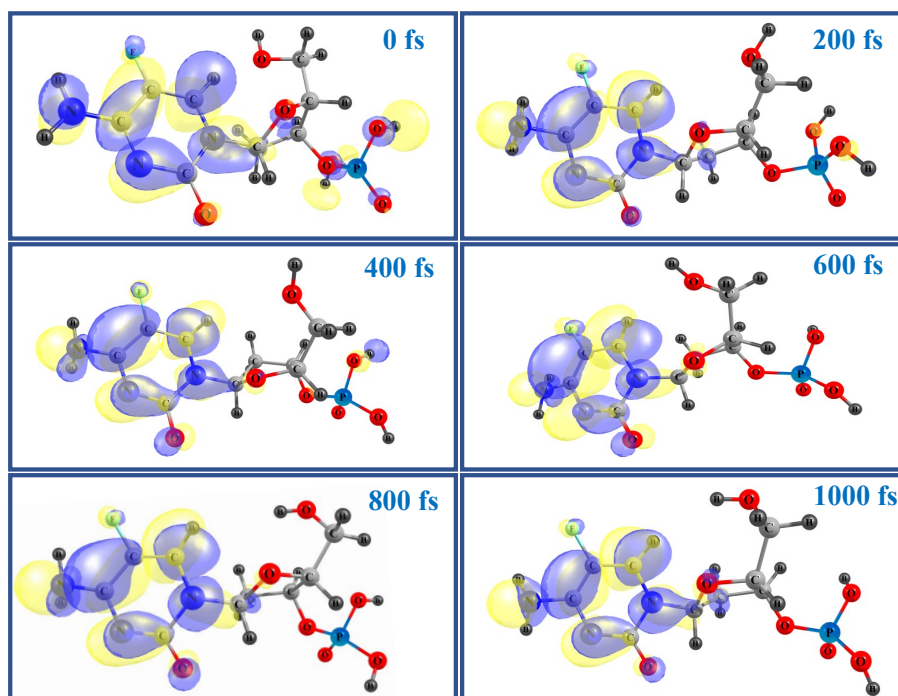

**Fig. S15:** Singly occupied molecular orbitals (SOMOs) of 5F-3'-dCMPH at various time intervals during *ab initio* molecular dynamics simulation conducted after the electron attachment.

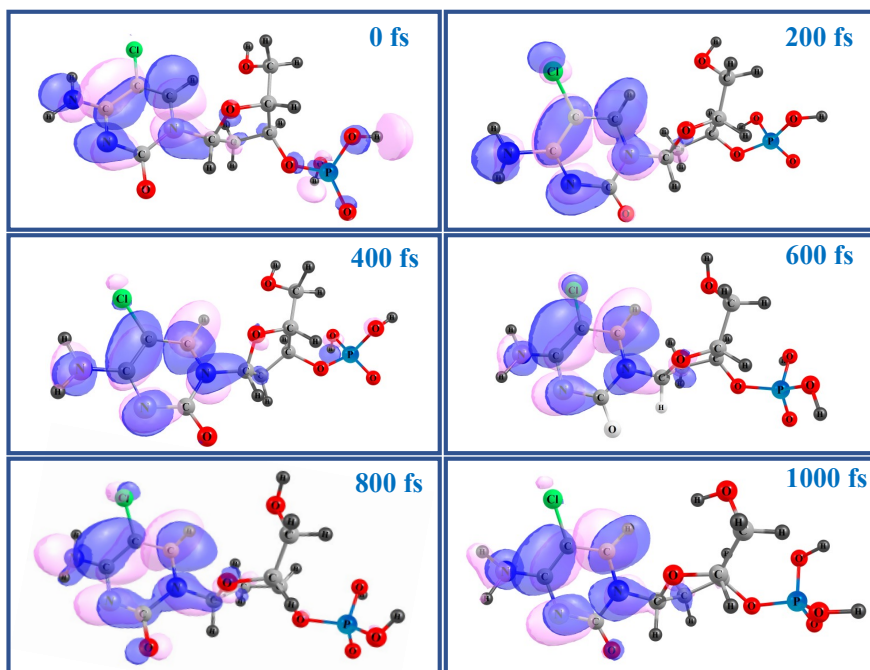

**Fig. S16:** Singly occupied molecular orbitals (SOMOs) of 5Cl-3'-dCMPH at various time intervals during *ab initio* molecular dynamics simulation conducted after the electron attachment.

**9. Cartesian coordinates of neutral 5X-3'-dCMPH moieties optimized at the M06-2X/ aug-cc-pVDZ level of theory in the aqueous phase.**

**(i) 3'-dCMPH**

|   |             |             |             |
|---|-------------|-------------|-------------|
| C | 0.30330000  | -0.24027300 | 0.16010600  |
| O | 0.08259600  | -0.63237000 | 1.53706600  |
| H | 0.44067600  | -0.28765500 | -3.56411500 |
| O | 0.70736300  | -0.21355000 | -2.64158500 |
| C | 0.61745900  | -1.49712600 | -2.03402700 |
| H | 1.28081700  | -2.21614600 | -2.53345000 |
| H | -0.41349200 | -1.87846500 | -2.06498300 |
| C | 1.03723500  | -1.36607800 | -0.58516400 |
| H | 0.86346500  | -2.32200100 | -0.07859400 |
| O | 2.43355600  | -1.05164600 | -0.50401000 |

|   |             |             |             |
|---|-------------|-------------|-------------|
| C | 2.64281900  | 0.16573300  | 0.19677600  |
| H | 2.97696900  | -0.02933700 | 1.21818100  |
| N | 3.73238400  | 0.88520500  | -0.45719400 |
| C | 3.69439400  | 1.04519700  | -1.80962900 |
| H | 2.82775500  | 0.61344300  | -2.31020000 |
| C | 4.68817900  | 1.69066800  | -2.46425200 |
| C | 5.76810300  | 2.18080500  | -1.65549100 |
| N | 6.79817200  | 2.81437100  | -2.24441900 |
| H | 7.55718500  | 3.16084500  | -1.67673600 |
| H | 6.82585700  | 2.95523300  | -3.24190300 |
| N | 5.80521200  | 2.03996500  | -0.33677000 |
| C | 4.79057100  | 1.40701900  | 0.31477400  |
| O | 4.76359300  | 1.27979200  | 1.54126900  |
| H | -0.64939500 | 0.02326900  | -0.30883000 |
| C | 1.30320000  | 0.90105000  | 0.15510500  |
| H | 1.20987300  | 1.45167200  | -0.78623500 |
| H | 1.16675000  | 1.58087300  | 0.99938100  |
| P | -1.34310400 | -1.24476600 | 1.95761300  |
| O | -1.38742700 | -1.63832400 | 3.39404400  |
| O | -1.52788600 | -2.38575500 | 0.83152200  |
| O | -2.46568400 | -0.17688200 | 1.49151200  |
| H | -2.69386000 | 0.44223200  | 2.20034400  |
| H | -2.37013400 | -2.85893500 | 0.90015500  |
| H | 4.67214000  | 1.81921000  | -3.54147900 |

**(ii) 5F-3'-dCMPH**

|   |            |             |             |
|---|------------|-------------|-------------|
| C | 0.30340900 | -0.24006300 | 0.16498700  |
| O | 0.07429800 | -0.63868100 | 1.53824000  |
| H | 0.48092700 | -0.26471600 | -3.56039300 |
| O | 0.74507900 | -0.19943100 | -2.63638000 |

|   |             |             |             |
|---|-------------|-------------|-------------|
| C | 0.63325500  | -1.48461800 | -2.03513200 |
| H | 1.29366100  | -2.20897800 | -2.53055600 |
| H | -0.40158600 | -1.85351700 | -2.07898500 |
| C | 1.03888200  | -1.36375400 | -0.58146500 |
| H | 0.85800300  | -2.32227100 | -0.08267300 |
| O | 2.43610400  | -1.05505700 | -0.48506300 |
| C | 2.64434000  | 0.16213400  | 0.21370300  |
| H | 2.98367900  | -0.02926300 | 1.23414000  |
| N | 3.73358000  | 0.88064800  | -0.44451200 |
| C | 3.68873600  | 1.01918200  | -1.80308900 |
| H | 2.83473900  | 0.58233300  | -2.32141600 |
| C | 4.68956400  | 1.66570100  | -2.42644100 |
| C | 5.77771700  | 2.18264100  | -1.65076700 |
| N | 6.78247300  | 2.80644100  | -2.28134800 |
| H | 7.55439700  | 3.17266300  | -1.74390000 |
| H | 6.77857900  | 2.91345600  | -3.28424400 |
| N | 5.80106600  | 2.05175800  | -0.33596300 |
| C | 4.78410000  | 1.41919300  | 0.32163400  |
| O | 4.75748700  | 1.31057600  | 1.54890200  |
| H | -0.64580300 | 0.02832900  | -0.30830500 |
| C | 1.30562300  | 0.89942500  | 0.17175100  |
| H | 1.21709200  | 1.45721500  | -0.76586300 |
| H | 1.16719900  | 1.57372100  | 1.02003100  |
| P | -1.35525400 | -1.25023100 | 1.94798800  |
| O | -1.40778300 | -1.65086800 | 3.38209200  |
| O | -1.53584000 | -2.38488400 | 0.81494000  |
| O | -2.47256600 | -0.17745800 | 1.48088900  |
| H | -2.70300300 | 0.43925100  | 2.19110700  |
| H | -2.37958500 | -2.85648100 | 0.87590000  |
| F | 4.71637500  | 1.83286800  | -3.76593400 |

(iii) 5Cl-3'-dCMPH

|   |             |             |             |
|---|-------------|-------------|-------------|
| C | 0.30606800  | -0.24324500 | 0.16766900  |
| O | 0.08032100  | -0.64589300 | 1.54005300  |
| H | 0.48130300  | -0.25586200 | -3.55942200 |
| O | 0.74412400  | -0.19359500 | -2.63480600 |
| C | 0.63133500  | -1.48054500 | -2.03766000 |
| H | 1.29008800  | -2.20427800 | -2.53615900 |
| H | -0.40400700 | -1.84806100 | -2.08111800 |
| C | 1.03915800  | -1.36469200 | -0.58425400 |
| H | 0.85937200  | -2.32481700 | -0.08833100 |
| O | 2.43718700  | -1.05702000 | -0.48900600 |
| C | 2.64693000  | 0.15847400  | 0.20981800  |
| H | 2.99264500  | -0.03337500 | 1.22811100  |
| N | 3.73364500  | 0.88048300  | -0.45376700 |
| C | 3.69736400  | 1.00861500  | -1.80613700 |
| H | 2.84312800  | 0.56001400  | -2.31432600 |
| C | 4.69130400  | 1.65597200  | -2.45657300 |
| C | 5.77371200  | 2.18546100  | -1.66866000 |
| N | 6.79566100  | 2.81346200  | -2.26583300 |
| H | 7.54553500  | 3.17653500  | -1.69596000 |
| H | 6.83186400  | 2.92718200  | -3.26721700 |
| N | 5.78742300  | 2.06775300  | -0.34976500 |
| C | 4.77656300  | 1.43994200  | 0.31330100  |
| O | 4.73977100  | 1.34733800  | 1.54042900  |
| H | -0.64408200 | 0.02720700  | -0.30255200 |
| C | 1.30842200  | 0.89630000  | 0.17514600  |
| H | 1.21722000  | 1.45683600  | -0.76057200 |
| H | 1.17280400  | 1.56793500  | 1.02596300  |

|    |             |             |             |
|----|-------------|-------------|-------------|
| P  | -1.34842800 | -1.25889000 | 1.95112000  |
| O  | -1.39785700 | -1.66312100 | 3.38427800  |
| O  | -1.53058200 | -2.39055800 | 0.81538400  |
| O  | -2.46673700 | -0.18519800 | 1.48873900  |
| H  | -2.69619500 | 0.42972600  | 2.20082800  |
| H  | -2.37445300 | -2.86200500 | 0.87584300  |
| Cl | 4.67782100  | 1.82915800  | -4.18635900 |

(iv) **5Br-3'-dCMPH**

|   |             |             |             |
|---|-------------|-------------|-------------|
| C | 0.30561100  | -0.24312300 | 0.16594200  |
| O | 0.07419800  | -0.64048600 | 1.53883000  |
| H | 0.50251200  | -0.26975300 | -3.56088500 |
| O | 0.75962800  | -0.20373600 | -2.63490200 |
| C | 0.64387100  | -1.48834500 | -2.03323800 |
| H | 1.30571700  | -2.21379100 | -2.52510600 |
| H | -0.39108100 | -1.85637000 | -2.08119900 |
| C | 1.04319100  | -1.36687000 | -0.57789200 |
| H | 0.86110200  | -2.32536000 | -0.07971800 |
| O | 2.44067800  | -1.05851600 | -0.47492700 |
| C | 2.64609700  | 0.16171600  | 0.21611800  |
| H | 2.99031200  | -0.02258200 | 1.23636800  |
| N | 3.73291700  | 0.88208600  | -0.45002200 |
| C | 3.70357700  | 0.99598700  | -1.80309000 |
| H | 2.85362000  | 0.53516400  | -2.30761400 |
| C | 4.69507700  | 1.64427000  | -2.45643500 |
| C | 5.77193500  | 2.18795300  | -1.67182700 |
| N | 6.79912600  | 2.81577100  | -2.26011300 |
| H | 7.53925700  | 3.18423400  | -1.68083600 |
| H | 6.85214800  | 2.92202300  | -3.26149700 |
| N | 5.77696300  | 2.08435400  | -0.35064500 |



|    |             |             |             |
|----|-------------|-------------|-------------|
| C  | 4.76730800  | 1.45930000  | 0.31562300  |
| O  | 4.72366400  | 1.38286600  | 1.54345800  |
| H  | -0.64261300 | 0.02450200  | -0.30979400 |
| C  | 1.30669800  | 0.89753700  | 0.17310400  |
| H  | 1.21911500  | 1.45408100  | -0.76532900 |
| H  | 1.16673500  | 1.57260300  | 1.02047900  |
| P  | -1.35613500 | -1.25252700 | 1.94600100  |
| O  | -1.41120400 | -1.65259800 | 3.38010400  |
| O  | -1.53350900 | -2.38745700 | 0.81277800  |
| O  | -2.47258000 | -0.18025200 | 1.47599800  |
| H  | -2.70465700 | 0.43688800  | 2.18531700  |
| H  | -2.37725100 | -2.85934900 | 0.87153000  |
| Br | 4.66815900  | 1.79701500  | -4.36678300 |

(v) **5I-3'-dCMPH**

|   |             |             |             |
|---|-------------|-------------|-------------|
| C | 0.31025200  | -0.24384500 | 0.16796000  |
| O | 0.07697700  | -0.64524100 | 1.53941400  |
| H | 0.50254100  | -0.26136200 | -3.55981400 |
| O | 0.75618000  | -0.19704400 | -2.63274600 |
| C | 0.64298900  | -1.48375200 | -2.03498500 |
| H | 1.30479900  | -2.20686400 | -2.53031700 |
| H | -0.39169100 | -1.85265900 | -2.08256000 |
| C | 1.04445800  | -1.36723000 | -0.57970300 |
| H | 0.86008800  | -2.32669800 | -0.08420200 |
| O | 2.44277400  | -1.06311700 | -0.47675000 |
| C | 2.65263700  | 0.15523000  | 0.21693300  |
| H | 2.99850500  | -0.03284100 | 1.23593900  |
| N | 3.73918000  | 0.87550100  | -0.44964600 |
| C | 3.70280000  | 1.00045300  | -1.80125900 |

|   |             |             |             |
|---|-------------|-------------|-------------|
| H | 2.84504400  | 0.54271300  | -2.29516800 |
| C | 4.68804800  | 1.64984000  | -2.46957700 |
| C | 5.76889600  | 2.18436300  | -1.67819800 |
| N | 6.79929900  | 2.81899300  | -2.25617800 |
| H | 7.53783300  | 3.17732300  | -1.66847400 |
| H | 6.85962100  | 2.94057800  | -3.25549100 |
| N | 5.78424000  | 2.07072400  | -0.35679800 |
| C | 4.78019200  | 1.44275700  | 0.31315700  |
| O | 4.74661100  | 1.35568700  | 1.54095000  |
| H | -0.63703200 | 0.02824900  | -0.30708900 |
| C | 1.31452500  | 0.89397900  | 0.17884600  |
| H | 1.22678000  | 1.45504500  | -0.75688300 |
| H | 1.17716700  | 1.56569400  | 1.02931500  |
| P | -1.35603200 | -1.25293600 | 1.94356200  |
| O | -1.41375300 | -1.65751200 | 3.37630800  |
| O | -1.53711700 | -2.38343100 | 0.80647400  |
| O | -2.46810400 | -0.17487100 | 1.47628900  |
| H | -2.69850700 | 0.44081800  | 2.18741200  |
| H | -2.38363000 | -2.85074600 | 0.86184200  |
| I | 4.61117600  | 1.81942600  | -4.55674700 |

**10. Cartesian coordinates of anionic 5X-3'-dCMPH moieties optimized at the M06-2X/ aug-cc-pVDZ level of theory in the aqueous phase.**

**(i) 3'-dCMPH**

|   |            |             |             |
|---|------------|-------------|-------------|
| C | 0.29804200 | -0.24393800 | 0.11267900  |
| O | 0.08681200 | -0.55884400 | 1.51664200  |
| H | 0.32373300 | -0.55330400 | -3.59596400 |

|   |             |             |             |
|---|-------------|-------------|-------------|
| O | 0.59906400  | -0.39949000 | -2.68609400 |
| C | 0.58466700  | -1.64154700 | -1.99225400 |
| H | 1.26275400  | -2.36426300 | -2.46706800 |
| H | -0.43040600 | -2.06585200 | -1.96727600 |
| C | 1.04164300  | -1.40662400 | -0.56632300 |
| H | 0.87754100  | -2.32895700 | 0.00538800  |
| O | 2.42612700  | -1.07244900 | -0.53432200 |
| C | 2.63975000  | 0.19253100  | 0.13045200  |
| H | 2.92274000  | 0.01243600  | 1.16973800  |
| N | 3.73310200  | 0.87631800  | -0.48678700 |
| C | 3.62768800  | 1.21052200  | -1.85753500 |
| H | 2.77109900  | 0.81119700  | -2.38881900 |
| C | 4.71161000  | 1.87202400  | -2.44591800 |
| C | 5.81606400  | 2.15534600  | -1.66581000 |
| N | 6.97496900  | 2.77174400  | -2.18746700 |
| H | 7.44114300  | 3.32873000  | -1.47761700 |
| H | 6.78369100  | 3.34023200  | -3.00538100 |
| N | 5.92650600  | 1.79823300  | -0.33907600 |
| C | 4.90768400  | 1.15391000  | 0.25246000  |
| O | 4.94582300  | 0.79482500  | 1.45282700  |
| H | -0.66401200 | -0.02538300 | -0.36057700 |
| C | 1.28526400  | 0.90182500  | 0.03469700  |
| H | 1.18818300  | 1.39262900  | -0.93796900 |
| H | 1.13857800  | 1.62943100  | 0.83739700  |
| P | -1.33193200 | -1.14488100 | 1.98174900  |
| O | -1.36551100 | -1.46835500 | 3.43691400  |
| O | -1.53905700 | -2.34205100 | 0.91849400  |

|   |             |             |             |
|---|-------------|-------------|-------------|
| O | -2.46234800 | -0.09918200 | 1.48067900  |
| H | -2.68099500 | 0.54945900  | 2.16551500  |
| H | -2.38329300 | -2.80418400 | 1.02491400  |
| H | 4.68191800  | 2.14518400  | -3.49950800 |

**(ii) 5F-3'-dCMPH**

|   |             |             |             |
|---|-------------|-------------|-------------|
| C | 0.28995000  | -0.24484900 | 0.11863400  |
| O | 0.06675500  | -0.56365600 | 1.51929500  |
| H | 0.39295200  | -0.54665600 | -3.59290600 |
| O | 0.64992500  | -0.39121600 | -2.67791100 |
| C | 0.63305000  | -1.63363500 | -1.98459600 |
| H | 1.32594900  | -2.35036700 | -2.44680200 |
| H | -0.37852900 | -2.06665200 | -1.97806700 |
| C | 1.06207100  | -1.39399300 | -0.55089300 |
| H | 0.90506400  | -2.31993100 | 0.01673200  |
| O | 2.44081400  | -1.03674200 | -0.49658900 |
| C | 2.62283100  | 0.23514200  | 0.16233000  |
| H | 2.90827200  | 0.06702900  | 1.20293300  |
| N | 3.70483500  | 0.93942900  | -0.45424200 |
| C | 3.57817000  | 1.27225800  | -1.82264300 |
| H | 2.78303600  | 0.80010300  | -2.39027000 |
| C | 4.65827800  | 1.94423000  | -2.37451400 |
| C | 5.77443900  | 2.25690300  | -1.63540200 |
| N | 6.80883200  | 3.06718200  | -2.13874500 |
| H | 7.69926700  | 2.81412200  | -1.72129000 |
| H | 6.87285600  | 3.03656200  | -3.15088800 |
| N | 5.90478700  | 1.85346600  | -0.32562200 |
| C | 4.90267600  | 1.18493800  | 0.26616300  |
| O | 4.96839700  | 0.77797300  | 1.44908900  |

|   |             |             |             |
|---|-------------|-------------|-------------|
| H | -0.66938800 | -0.04257700 | -0.36723200 |
| C | 1.25717500  | 0.91880200  | 0.05304200  |
| H | 1.16156200  | 1.40876200  | -0.92032400 |
| H | 1.08820400  | 1.64309700  | 0.85417500  |
| P | -1.34890600 | -1.17172400 | 1.96639200  |
| O | -1.39512500 | -1.49703000 | 3.42069800  |
| O | -1.52373100 | -2.37039400 | 0.89915200  |
| O | -2.48835000 | -0.14277300 | 1.45186500  |
| H | -2.72274700 | 0.50412100  | 2.13316600  |
| H | -2.36141500 | -2.84665400 | 0.99461300  |
| F | 4.60698900  | 2.31199500  | -3.69546900 |

**(iii) 5Cl-3'-dCMPH**

|   |             |             |             |
|---|-------------|-------------|-------------|
| C | 0.29156600  | -0.24741100 | 0.11783900  |
| O | 0.06678100  | -0.55744000 | 1.52006600  |
| H | 0.39909900  | -0.57370400 | -3.59169900 |
| O | 0.65146600  | -0.41137000 | -2.67661500 |
| C | 0.63888900  | -1.64961800 | -1.97592800 |
| H | 1.33488300  | -2.36651900 | -2.43314700 |
| H | -0.37101700 | -2.08648300 | -1.96747900 |
| C | 1.06579300  | -1.39985800 | -0.54334700 |
| H | 0.90989800  | -2.32222200 | 0.03025300  |
| O | 2.44430500  | -1.04030900 | -0.48960000 |
| C | 2.62333400  | 0.23576300  | 0.15962800  |
| H | 2.90966800  | 0.07571300  | 1.20135800  |
| N | 3.70447900  | 0.93871900  | -0.46322900 |
| C | 3.57877100  | 1.26112700  | -1.83155400 |
| H | 2.78720800  | 0.77440100  | -2.39153200 |

|    |             |             |             |
|----|-------------|-------------|-------------|
| C  | 4.65579500  | 1.94426200  | -2.40251700 |
| C  | 5.77180100  | 2.25710600  | -1.65582100 |
| N  | 6.81428500  | 3.06506300  | -2.12782800 |
| H  | 7.68435600  | 2.85297400  | -1.65177500 |
| H  | 6.92868100  | 3.04415900  | -3.13488700 |
| N  | 5.90822000  | 1.84100000  | -0.35260100 |
| C  | 4.90664000  | 1.17433300  | 0.24721900  |
| O  | 4.98441700  | 0.76587300  | 1.42627200  |
| H  | -0.66719600 | -0.04923800 | -0.37078100 |
| C  | 1.25726000  | 0.91733000  | 0.04578400  |
| H  | 1.16163400  | 1.40138700  | -0.93050200 |
| H  | 1.08691100  | 1.64601000  | 0.84259100  |
| P  | -1.34896600 | -1.16464400 | 1.96854600  |
| O  | -1.39709700 | -1.48100100 | 3.42472800  |
| O  | -1.52015800 | -2.36990400 | 0.90820400  |
| O  | -2.48876600 | -0.14036800 | 1.44571400  |
| H  | -2.72526600 | 0.51030800  | 2.12267600  |
| H  | -2.35813800 | -2.84564200 | 1.00366800  |
| Cl | 4.54888700  | 2.41744000  | -4.09550000 |

(iv) **5Br-3'-dCMPH**

|   |            |             |             |
|---|------------|-------------|-------------|
| C | 0.29295800 | -0.24260300 | 0.10743600  |
| O | 0.05403600 | -0.51794900 | 1.51443700  |
| H | 0.43557600 | -0.65357700 | -3.59231700 |
| O | 0.67889900 | -0.47169000 | -2.67846500 |
| C | 0.65354300 | -1.69379000 | -1.95023100 |
| H | 1.35047400 | -2.42400400 | -2.38431800 |

|   |             |             |             |
|---|-------------|-------------|-------------|
| H | -0.35849500 | -2.12572800 | -1.94179000 |
| C | 1.06813500  | -1.41334600 | -0.51969200 |
| H | 0.90305200  | -2.32161400 | 0.07347000  |
| O | 2.44756600  | -1.05792600 | -0.46188500 |
| C | 2.62537500  | 0.23281600  | 0.15914100  |
| H | 2.90229900  | 0.09272000  | 1.20650300  |
| N | 3.71195100  | 0.92190200  | -0.46829400 |
| C | 3.60123000  | 1.21622500  | -1.84318900 |
| H | 2.81778800  | 0.71853100  | -2.40584100 |
| C | 4.64837800  | 1.95178900  | -2.39377200 |
| C | 5.76853900  | 2.25709500  | -1.65017900 |
| N | 6.77229500  | 3.13924900  | -2.06599800 |
| H | 7.65281000  | 2.92961100  | -1.60832900 |
| H | 6.88037900  | 3.20059500  | -3.07213300 |
| N | 5.95223400  | 1.72800300  | -0.39396100 |
| C | 4.95163400  | 1.06263700  | 0.20768500  |
| O | 5.05599500  | 0.58250200  | 1.35620600  |
| H | -0.66031500 | -0.05174100 | -0.39460500 |
| C | 1.26411000  | 0.91651000  | 0.01707300  |
| H | 1.17915900  | 1.37783600  | -0.97115300 |
| H | 1.08939000  | 1.66436100  | 0.79487700  |
| P | -1.36772200 | -1.10992600 | 1.96444000  |
| O | -1.43227300 | -1.38418400 | 3.42848900  |
| O | -1.52929700 | -2.34467000 | 0.93707500  |
| O | -2.49992200 | -0.09948000 | 1.39996500  |
| H | -2.74436200 | 0.56908100  | 2.05633800  |
| H | -2.37112600 | -2.81334400 | 1.03356700  |

Br 4.46589400 2.58134400 -4.23075200

(v) **5I-3'-dCMPH**

C 0.30070000 -0.23919500 0.10156300  
O 0.05105500 -0.49207300 1.51075600  
H 0.46105600 -0.70204000 -3.59074100  
O 0.69755200 -0.50933200 -2.67731600  
C 0.66123600 -1.72173800 -1.93345000  
H 1.35632200 -2.46151400 -2.35400300  
H -0.35331700 -2.14772200 -1.92504200  
C 1.06961000 -1.42504400 -0.50433800  
H 0.89358500 -2.32358400 0.10028500  
O 2.45179600 -1.08031500 -0.44272600  
C 2.63676000 0.21851900 0.15809300  
H 2.90967400 0.09154300 1.20839800  
N 3.72804600 0.89355500 -0.47746900  
C 3.63405300 1.15573000 -1.85742500  
H 2.84813400 0.65255500 -2.41311900  
C 4.64384100 1.93679800 -2.40693100  
C 5.75543600 2.25587400 -1.64657000  
N 6.71730400 3.20150500 -2.01185200  
H 7.60969900 3.00936800 -1.57000900  
H 6.81176200 3.34341300 -3.01140800  
N 5.98206100 1.65075400 -0.43383100  
C 4.98710500 0.98113000 0.17360500  
O 5.11079100 0.45803200 1.30029200  
H -0.64775300 -0.04727200 -0.40907400



|   |             |             |             |
|---|-------------|-------------|-------------|
| C | 1.28209300  | 0.91060400  | 0.00033400  |
| H | 1.20614500  | 1.35840500  | -0.99494200 |
| H | 1.10933300  | 1.67090600  | 0.76635300  |
| P | -1.37757300 | -1.06796800 | 1.96026200  |
| O | -1.45348300 | -1.31913700 | 3.42788800  |
| O | -1.54019800 | -2.31740600 | 0.95098600  |
| O | -2.49932500 | -0.05921400 | 1.37252400  |
| H | -2.74531100 | 0.61980900  | 2.01746900  |
| H | -2.38646800 | -2.77800300 | 1.04759400  |
| I | 4.37602500  | 2.70028100  | -4.39434100 |

**11. Cartesian coordinates transition states for C<sub>5</sub>-X bond cleavage calculated at the M06-2X/ aug-cc-pVDZ level of theory in the aqueous phase.**

**(i) 5F-3'-dCMPH**

|   |             |             |             |
|---|-------------|-------------|-------------|
| C | 0.31721400  | -0.21433300 | -0.01547900 |
| O | 0.06883000  | -0.47711800 | 1.39033100  |
| H | 0.44238200  | -0.63434100 | -3.71336600 |
| O | 0.68654000  | -0.46242700 | -2.79779000 |
| C | 0.61781300  | -1.68331700 | -2.07102300 |
| H | 1.28714000  | -2.43841300 | -2.50546500 |
| H | -0.40897600 | -2.07839500 | -2.06004800 |
| C | 1.04380900  | -1.41593400 | -0.64202900 |
| H | 0.85027700  | -2.31520000 | -0.04466400 |
| O | 2.43899300  | -1.11205400 | -0.59010200 |
| C | 2.66211700  | 0.15934300  | 0.03177600  |
| H | 2.93870000  | 0.01526500  | 1.07891000  |
| N | 3.78343500  | 0.80726300  | -0.60645500 |

|   |             |             |             |
|---|-------------|-------------|-------------|
| C | 3.71624700  | 1.06158800  | -1.98708400 |
| H | 2.84676100  | 0.63364300  | -2.48281100 |
| C | 4.73885800  | 1.71200300  | -2.61642500 |
| C | 5.81115800  | 2.13154200  | -1.75950000 |
| N | 6.74050900  | 2.97880500  | -2.25786900 |
| H | 7.39726700  | 3.40466300  | -1.62045300 |
| H | 6.50119300  | 3.45544400  | -3.11582000 |
| N | 5.97935000  | 1.68924700  | -0.51669000 |
| C | 4.95935900  | 1.01909600  | 0.10482200  |
| O | 5.06106700  | 0.64038400  | 1.28581000  |
| H | -0.62605900 | 0.01633300  | -0.51936400 |
| C | 1.33534000  | 0.90528000  | -0.10855300 |
| H | 1.26600500  | 1.36836900  | -1.09718100 |
| H | 1.19398900  | 1.66090600  | 0.66814900  |
| P | -1.37803700 | -1.00649000 | 1.84227200  |
| O | -1.45210700 | -1.27673700 | 3.30630500  |
| O | -1.59220600 | -2.23305700 | 0.81521400  |
| O | -2.46301500 | 0.05316400  | 1.27650300  |
| H | -2.67329600 | 0.73700100  | 1.92907700  |
| H | -2.44895100 | -2.67253300 | 0.91828700  |
| F | 4.38657000  | 3.06867500  | -3.61603100 |

**(ii) 5Cl-3'-dCMPH**

|   |            |             |             |
|---|------------|-------------|-------------|
| C | 0.32285900 | -0.21432400 | -0.01628500 |
| O | 0.07151200 | -0.45746400 | 1.39330600  |
| H | 0.44036800 | -0.68801000 | -3.70842400 |
| O | 0.69042200 | -0.50452800 | -2.79669800 |

|   |             |             |             |
|---|-------------|-------------|-------------|
| C | 0.61132900  | -1.71354700 | -2.05128700 |
| H | 1.27355200  | -2.48103300 | -2.47498700 |
| H | -0.41898100 | -2.09933000 | -2.03412700 |
| C | 1.04115400  | -1.42928900 | -0.62640300 |
| H | 0.83964100  | -2.31899600 | -0.01693100 |
| O | 2.43718600  | -1.13495600 | -0.57932800 |
| C | 2.67255900  | 0.14856200  | 0.02391300  |
| H | 2.95106400  | 0.01217600  | 1.07169800  |
| N | 3.78777100  | 0.78280600  | -0.62549200 |
| C | 3.70354900  | 1.05623600  | -2.00152600 |
| H | 2.89995900  | 0.56020000  | -2.54218900 |
| C | 4.70794700  | 1.80851300  | -2.56331600 |
| C | 5.79529000  | 2.17332400  | -1.75467200 |
| N | 6.71576500  | 3.10517000  | -2.14304900 |
| H | 7.32360400  | 3.46471700  | -1.42152300 |
| H | 6.46742700  | 3.72855800  | -2.89774700 |
| N | 6.03925400  | 1.54831000  | -0.58274600 |
| C | 5.02236500  | 0.88712300  | 0.03552700  |
| O | 5.14985500  | 0.40858400  | 1.17716900  |
| H | -0.61914100 | 0.01557500  | -0.52297100 |
| C | 1.34804800  | 0.89666900  | -0.12372100 |
| H | 1.28335700  | 1.34633300  | -1.11908100 |
| H | 1.21083300  | 1.66375300  | 0.64254300  |
| P | -1.38191900 | -0.96122400 | 1.85170600  |
| O | -1.46037000 | -1.21084100 | 3.31931400  |
| O | -1.61353200 | -2.19892900 | 0.84176700  |
| O | -2.45328300 | 0.10484400  | 1.27156300  |

|    |             |             |             |
|----|-------------|-------------|-------------|
| H  | -2.65204200 | 0.80200300  | 1.91355200  |
| H  | -2.47621100 | -2.62491200 | 0.95184200  |
| Cl | 4.28104100  | 3.08337800  | -4.03367000 |

**(iii) 5Br-3'-dCMPH**

|   |             |             |             |
|---|-------------|-------------|-------------|
| C | 0.31675800  | -0.20754800 | -0.01457500 |
| O | 0.07122300  | -0.45472200 | 1.39560200  |
| H | 0.44026600  | -0.67089100 | -3.70917600 |
| O | 0.69015000  | -0.48827300 | -2.79722100 |
| C | 0.61479400  | -1.69906600 | -2.05410600 |
| H | 1.28061000  | -2.46301000 | -2.47865700 |
| H | -0.41404300 | -2.08893300 | -2.03930600 |
| C | 1.04201300  | -1.41667900 | -0.62793700 |
| H | 0.84404100  | -2.30951400 | -0.02176200 |
| O | 2.43585400  | -1.11498700 | -0.57826300 |
| C | 2.66429300  | 0.17203400  | 0.02501800  |
| H | 2.94340300  | 0.03494800  | 1.07255300  |
| N | 3.77280100  | 0.81462400  | -0.62220300 |
| C | 3.68181400  | 1.09056700  | -1.99650500 |
| H | 2.89723900  | 0.58325200  | -2.55437300 |
| C | 4.68761300  | 1.85797400  | -2.53136700 |
| C | 5.79165700  | 2.19031500  | -1.75792800 |
| N | 6.74269200  | 3.11623700  | -2.13721000 |
| H | 7.29341800  | 3.47947300  | -1.37051400 |
| H | 6.44850400  | 3.80830800  | -2.81344900 |
| N | 6.04628600  | 1.52314700  | -0.59753600 |
| C | 5.03351700  | 0.86876600  | 0.01757500  |

|    |             |             |             |
|----|-------------|-------------|-------------|
| O  | 5.16231100  | 0.34233100  | 1.13890100  |
| H  | -0.62840900 | 0.01650000  | -0.51806000 |
| C  | 1.33425100  | 0.91020900  | -0.12233900 |
| H  | 1.26649400  | 1.35927600  | -1.11780400 |
| H  | 1.19192100  | 1.67639900  | 0.64394000  |
| P  | -1.37671500 | -0.96974900 | 1.85822300  |
| O  | -1.44808700 | -1.22290900 | 3.32562400  |
| O  | -1.60363100 | -2.20708700 | 0.84673500  |
| O  | -2.45793200 | 0.08992800  | 1.28453400  |
| H  | -2.65998400 | 0.78338400  | 1.92948300  |
| H  | -2.46313700 | -2.63885000 | 0.95899300  |
| Br | 4.32932200  | 2.95160900  | -4.29528800 |

(iv) **5I-3'-dCMPH**

|   |             |             |             |
|---|-------------|-------------|-------------|
| C | 0.30837600  | -0.23938800 | 0.10399400  |
| O | 0.04799000  | -0.48195900 | 1.51255800  |
| H | 0.48727600  | -0.72108600 | -3.58465200 |
| O | 0.72029900  | -0.52742900 | -2.67051600 |
| C | 0.66524200  | -1.73595400 | -1.92163600 |
| H | 1.35466200  | -2.48552200 | -2.33398600 |
| H | -0.35404400 | -2.15042900 | -1.91783300 |
| C | 1.06728700  | -1.43678100 | -0.49134800 |
| H | 0.87852500  | -2.33024500 | 0.11671700  |
| O | 2.45350800  | -1.10680400 | -0.42252300 |
| C | 2.64852000  | 0.19231000  | 0.16950500  |
| H | 2.91984800  | 0.07098900  | 1.22101400  |
| N | 3.74777200  | 0.85332700  | -0.47224300 |
| C | 3.66820300  | 1.09548100  | -1.85249400 |

|   |             |             |             |
|---|-------------|-------------|-------------|
| H | 2.89298700  | 0.57260200  | -2.40824400 |
| C | 4.65753000  | 1.88459500  | -2.39805300 |
| C | 5.75275400  | 2.23743600  | -1.62139100 |
| N | 6.65823600  | 3.23688800  | -1.95796100 |
| H | 7.56135400  | 3.10149500  | -1.51830400 |
| H | 6.72463200  | 3.44155400  | -2.94840400 |
| N | 6.00715900  | 1.59509700  | -0.43985500 |
| C | 5.00963500  | 0.92735500  | 0.17386900  |
| O | 5.13826600  | 0.39877700  | 1.29545800  |
| H | -0.63446900 | -0.03896000 | -0.41365600 |
| C | 1.30329700  | 0.89898700  | 0.00201000  |
| H | 1.23784900  | 1.34129500  | -0.99666600 |
| H | 1.13507700  | 1.66608300  | 0.76213600  |
| P | -1.39029100 | -1.03878500 | 1.95636100  |
| O | -1.47692100 | -1.28425000 | 3.42428400  |
| O | -1.56246000 | -2.28919200 | 0.94998200  |
| O | -2.49561500 | -0.01773200 | 1.35911900  |
| H | -2.73573100 | 0.66723000  | 2.00001200  |
| H | -2.41349500 | -2.74126300 | 1.04515200  |
| I | 4.34140800  | 2.75625600  | -4.40662900 |

**12. Cartesian coordinates transition states for C<sub>3'</sub>-O<sub>3'</sub> bond cleavage calculated at the M06-2X/ aug-cc-pVDZ level of theory in the aqueous phase.**

**(i) 3'-dCMPH**

|   |            |             |             |
|---|------------|-------------|-------------|
| C | 0.24566500 | -0.14265100 | 0.13254800  |
| O | 0.02012400 | -0.60178300 | 1.81442800  |
| H | 0.69970900 | -0.41442100 | -3.61644900 |
| O | 0.85167300 | -0.26645600 | -2.67702700 |

|   |             |             |             |
|---|-------------|-------------|-------------|
| C | 0.65566400  | -1.49830000 | -1.98878800 |
| H | 1.31695200  | -2.27807300 | -2.39391000 |
| H | -0.38774700 | -1.83605000 | -2.07709100 |
| C | 0.96908600  | -1.29870900 | -0.51677200 |
| H | 0.74492200  | -2.23800000 | 0.00546800  |
| O | 2.37248600  | -1.01288900 | -0.36099000 |
| C | 2.55687200  | 0.22069500  | 0.31531300  |
| H | 2.82520800  | 0.05135300  | 1.35979300  |
| N | 3.70151000  | 0.90296900  | -0.29411400 |
| C | 3.74679600  | 1.01475100  | -1.64928800 |
| H | 2.90931000  | 0.56529400  | -2.18311700 |
| C | 4.78147900  | 1.63564600  | -2.26648400 |
| C | 5.80983400  | 2.15443000  | -1.41214200 |
| N | 6.87783200  | 2.76601600  | -1.95842100 |
| H | 7.59911200  | 3.13510500  | -1.35703000 |
| H | 6.96688400  | 2.87226600  | -2.95644100 |
| N | 5.76449000  | 2.06286800  | -0.08931100 |
| C | 4.70759600  | 1.45554700  | 0.52056600  |
| O | 4.60498200  | 1.37978200  | 1.74833300  |
| H | -0.76322700 | 0.06729900  | -0.21796600 |
| C | 1.23740800  | 0.98253600  | 0.17881000  |
| H | 1.24089700  | 1.55576500  | -0.76138300 |
| H | 1.07912900  | 1.67111900  | 1.01493500  |
| P | -1.33879300 | -1.26039100 | 2.40259700  |
| O | -2.00557500 | -1.92391100 | 3.63576500  |
| O | -1.54966300 | -2.38777300 | 1.17704900  |
| O | -2.40266000 | -0.05154400 | 1.93668800  |

|   |             |             |             |
|---|-------------|-------------|-------------|
| H | -3.24179200 | -0.20658900 | 2.38900200  |
| H | -2.22528900 | -3.01360000 | 1.46682700  |
| H | 4.83172900  | 1.72477400  | -3.34671400 |

**(ii) 5F-3'-dCMPH**

|   |             |             |             |
|---|-------------|-------------|-------------|
| C | 0.24463700  | -0.14123700 | 0.14016600  |
| O | 0.01015300  | -0.60670900 | 1.81777200  |
| H | 0.74277500  | -0.39258200 | -3.60598500 |
| O | 0.89063100  | -0.25242000 | -2.66462100 |
| C | 0.67613100  | -1.48622000 | -1.98457600 |
| H | 1.33665700  | -2.26884700 | -2.38516300 |
| H | -0.36858400 | -1.81501000 | -2.08777500 |
| C | 0.97268500  | -1.29463800 | -0.50807000 |
| H | 0.74281000  | -2.23639800 | 0.00684200  |
| O | 2.37503800  | -1.01116600 | -0.33520000 |
| C | 2.55516500  | 0.22506300  | 0.33534200  |
| H | 2.82920600  | 0.06291500  | 1.37950700  |
| N | 3.69818400  | 0.90686500  | -0.27991900 |
| C | 3.72629500  | 1.00950600  | -1.64049300 |
| H | 2.89440700  | 0.56575300  | -2.18927500 |
| C | 4.76648100  | 1.62861800  | -2.22860400 |
| C | 5.81743900  | 2.15521800  | -1.41236800 |
| N | 6.86262800  | 2.75211600  | -2.00502000 |
| H | 7.60840900  | 3.12533100  | -1.43665800 |
| H | 6.91317000  | 2.83214800  | -3.00901500 |
| N | 5.76992700  | 2.06040600  | -0.09499600 |
| C | 4.71105600  | 1.45611300  | 0.52437600  |
| O | 4.62147700  | 1.38454500  | 1.75242800  |



|   |             |             |             |
|---|-------------|-------------|-------------|
| H | -0.76209100 | 0.06942300  | -0.21606200 |
| C | 1.23469100  | 0.98504400  | 0.19626800  |
| H | 1.24102000  | 1.56407300  | -0.74036700 |
| H | 1.07186800  | 1.66904900  | 1.03518900  |
| P | -1.35224800 | -1.26961300 | 2.39420300  |
| O | -2.02638700 | -1.94020000 | 3.61932300  |
| O | -1.55349000 | -2.39078500 | 1.16143600  |
| O | -2.41349400 | -0.05911300 | 1.92715400  |
| H | -3.25602000 | -0.21739000 | 2.37200000  |
| H | -2.23014600 | -3.01906500 | 1.44340000  |
| F | 4.86439400  | 1.75804500  | -3.57030700 |

**(iii) 5Cl-3'-dCMPH**

|   |             |             |             |
|---|-------------|-------------|-------------|
| C | 0.24438800  | -0.14178100 | 0.14024900  |
| O | 0.01306300  | -0.60719400 | 1.81751200  |
| H | 0.74488300  | -0.39198000 | -3.60757200 |
| O | 0.88870600  | -0.25160200 | -2.66560400 |
| C | 0.67366700  | -1.48565400 | -1.98623000 |
| H | 1.33352200  | -2.26853900 | -2.38734600 |
| H | -0.37128200 | -1.81378400 | -2.08907600 |
| C | 0.97097200  | -1.29502300 | -0.50978500 |
| H | 0.74163900  | -2.23697500 | 0.00490800  |
| O | 2.37397800  | -1.01215000 | -0.33773200 |
| C | 2.55471700  | 0.22341400  | 0.33188600  |
| H | 2.83232300  | 0.06227700  | 1.37532600  |
| N | 3.69730000  | 0.90664400  | -0.28715500 |
| C | 3.72838500  | 1.00813900  | -1.64028700 |

|    |             |             |             |
|----|-------------|-------------|-------------|
| H  | 2.89179000  | 0.55992800  | -2.17845200 |
| C  | 4.76354200  | 1.62677000  | -2.25592800 |
| C  | 5.81466600  | 2.15500000  | -1.42890800 |
| N  | 6.87494400  | 2.75674900  | -1.98788300 |
| H  | 7.60215900  | 3.11901100  | -1.38909300 |
| H  | 6.96101300  | 2.85007500  | -2.98816800 |
| N  | 5.76375900  | 2.06272500  | -0.10882000 |
| C  | 4.71107600  | 1.46303700  | 0.51672000  |
| O  | 4.61888600  | 1.39608100  | 1.74348200  |
| H  | -0.76277500 | 0.06957900  | -0.21425600 |
| C  | 1.23465300  | 0.98440200  | 0.19506800  |
| H  | 1.23998500  | 1.56330300  | -0.74168500 |
| H  | 1.07307900  | 1.66847100  | 1.03413200  |
| P  | -1.34893700 | -1.26938500 | 2.39629400  |
| O  | -2.02180900 | -1.93813400 | 3.62301900  |
| O  | -1.55163300 | -2.39166500 | 1.16489300  |
| O  | -2.41002800 | -0.05893000 | 1.92904500  |
| H  | -3.25223400 | -0.21623200 | 2.37484100  |
| H  | -2.22813700 | -3.01960500 | 1.44798600  |
| Cl | 4.83359900  | 1.76554200  | -3.98862400 |

(iv) **5Br-3'-dCMPH**

|   |            |             |             |
|---|------------|-------------|-------------|
| C | 0.24531500 | -0.13985600 | 0.14337000  |
| O | 0.01305000 | -0.61033600 | 1.81889400  |
| H | 0.75127300 | -0.37870100 | -3.60580500 |
| O | 0.89346300 | -0.24176500 | -2.66305200 |
| C | 0.67316700 | -1.47726200 | -1.98789500 |

|   |             |             |             |
|---|-------------|-------------|-------------|
| H | 1.33082300  | -2.26112400 | -2.39069700 |
| H | -0.37277700 | -1.80137100 | -2.09327700 |
| C | 0.96898900  | -1.29275100 | -0.51032000 |
| H | 0.73644500  | -2.23596100 | 0.00050000  |
| O | 2.37275900  | -1.01493800 | -0.33475800 |
| C | 2.55686600  | 0.21923000  | 0.33550600  |
| H | 2.83713100  | 0.05680700  | 1.37811800  |
| N | 3.69914600  | 0.90181800  | -0.28605800 |
| C | 3.73344500  | 0.99439600  | -1.63891800 |
| H | 2.89944300  | 0.53599800  | -2.17253900 |
| C | 4.76469700  | 1.61657300  | -2.25767900 |
| C | 5.81211900  | 2.15706400  | -1.43514000 |
| N | 6.87499200  | 2.76257400  | -1.98511800 |
| H | 7.59257900  | 3.12984500  | -1.37763500 |
| H | 6.97426100  | 2.85482000  | -2.98424000 |
| N | 5.75614200  | 2.07340700  | -0.11360200 |
| C | 4.70665300  | 1.47303800  | 0.51539500  |
| O | 4.61114200  | 1.41687300  | 1.74226600  |
| H | -0.76123300 | 0.07536500  | -0.21058800 |
| C | 1.23842100  | 0.98366000  | 0.20177800  |
| H | 1.24561800  | 1.56536100  | -0.73324400 |
| H | 1.07871900  | 1.66563100  | 1.04290200  |
| P | -1.34958500 | -1.27344900 | 2.39539500  |
| O | -2.02308000 | -1.94581200 | 3.61977800  |
| O | -1.55289700 | -2.39155200 | 1.16029100  |
| O | -2.40972300 | -0.06072000 | 1.93193700  |
| H | -3.25200600 | -0.21870900 | 2.37735000  |

|    |             |             |             |
|----|-------------|-------------|-------------|
| H  | -2.22997000 | -3.01985300 | 1.44121300  |
| Br | 4.82542100  | 1.73653500  | -4.17070300 |

(v) **5I-3'-dCMPH**

|   |             |             |             |
|---|-------------|-------------|-------------|
| C | 0.24663200  | -0.14024300 | 0.14169700  |
| O | 0.01360600  | -0.60915700 | 1.81769100  |
| H | 0.75696000  | -0.38483400 | -3.60821700 |
| O | 0.89182800  | -0.24468100 | -2.66485300 |
| C | 0.67559000  | -1.48001600 | -1.98804500 |
| H | 1.33559700  | -2.26234100 | -2.38996400 |
| H | -0.36938400 | -1.80748900 | -2.09299300 |
| C | 0.97100400  | -1.29353300 | -0.51052600 |
| H | 0.73823200  | -2.23630100 | 0.00109400  |
| O | 2.37451000  | -1.01537000 | -0.33429700 |
| C | 2.55821800  | 0.21983500  | 0.33482000  |
| H | 2.83742700  | 0.05810300  | 1.37783300  |
| N | 3.70062100  | 0.90233400  | -0.28626200 |
| C | 3.73319500  | 1.00039800  | -1.63849500 |
| H | 2.89359900  | 0.54245000  | -2.16354600 |
| C | 4.76111200  | 1.62192600  | -2.27070300 |
| C | 5.80899300  | 2.15616500  | -1.43895800 |
| N | 6.87727800  | 2.76493400  | -1.97745400 |
| H | 7.59230300  | 3.12228700  | -1.36103700 |
| H | 6.99006200  | 2.86142900  | -2.97479200 |
| N | 5.75732600  | 2.06904500  | -0.11642800 |
| C | 4.71013100  | 1.46919400  | 0.51463900  |
| O | 4.61806000  | 1.40957200  | 1.74193300  |
| H | -0.75982300 | 0.07437100  | -0.21290600 |

|   |             |             |             |
|---|-------------|-------------|-------------|
| C | 1.23940400  | 0.98357300  | 0.19977100  |
| H | 1.24663200  | 1.56479800  | -0.73553500 |
| H | 1.07892500  | 1.66596800  | 1.04041100  |
| P | -1.34951700 | -1.27076100 | 2.39461500  |
| O | -2.02383200 | -1.94102900 | 3.61972900  |
| O | -1.55315200 | -2.39041900 | 1.16097000  |
| O | -2.40889300 | -0.05806400 | 1.92925500  |
| H | -3.25133400 | -0.21496200 | 2.37474900  |
| H | -2.23061500 | -3.01797400 | 1.44262100  |
| I | 4.78891300  | 1.75123700  | -4.36254600 |

**13. Cartesian coordinates of transition states for C-N bond cleavage calculated at the M06-2X/ aug-cc-pVDZ level of theory in the aqueous phase.**

**(i) 3'-dCMPH**

|   |             |             |             |
|---|-------------|-------------|-------------|
| C | 0.77961400  | -0.15652200 | 0.11398200  |
| O | 0.24412000  | -0.46018600 | 1.43113800  |
| H | 0.97606000  | -0.24953200 | -3.60229200 |
| O | 1.14186600  | -0.21474300 | -2.65455400 |
| C | 0.76347300  | -1.45926800 | -2.08301900 |
| H | 1.27821100  | -2.29554800 | -2.57650300 |
| H | -0.32326000 | -1.61243800 | -2.16369700 |
| C | 1.13277900  | -1.46350800 | -0.61464200 |
| H | 0.61950500  | -2.30398400 | -0.13082000 |
| O | 2.54869000  | -1.64586100 | -0.43621900 |
| C | 3.08114600  | -0.63893100 | 0.35579200  |
| H | 3.52260800  | -0.97040800 | 1.29415200  |
| N | 4.73818000  | -0.14041500 | -0.63927600 |

|   |             |             |             |
|---|-------------|-------------|-------------|
| C | 4.45350700  | 0.15702700  | -1.92469100 |
| H | 4.10801900  | -0.67436100 | -2.53999900 |
| C | 4.54786500  | 1.44801700  | -2.45696700 |
| C | 5.04193000  | 2.42976900  | -1.60073400 |
| N | 5.26710800  | 3.73826200  | -2.03747600 |
| H | 5.26034600  | 4.41041800  | -1.27922400 |
| H | 4.68197900  | 4.02877100  | -2.81107600 |
| N | 5.39827000  | 2.16993400  | -0.32909700 |
| C | 5.25026500  | 0.90857100  | 0.15452400  |
| O | 5.54744700  | 0.64040000  | 1.34545700  |
| H | 0.05812100  | 0.45200700  | -0.43881000 |
| C | 2.13430800  | 0.51989900  | 0.30057700  |
| H | 2.34690200  | 1.10965500  | -0.60663400 |
| H | 2.15728900  | 1.16786500  | 1.18020300  |
| P | -1.34544900 | -0.50841700 | 1.63553100  |
| O | -1.72976200 | -0.87354900 | 3.02956600  |
| O | -1.78857100 | -1.48971900 | 0.43197600  |
| O | -1.93648100 | 0.90321100  | 1.10493100  |
| H | -2.00196800 | 1.55561900  | 1.81744100  |
| H | -2.74624600 | -1.62499200 | 0.38461500  |
| H | 4.29021000  | 1.66123900  | -3.49190500 |

(i) **5F-3'-dCMPH**

|   |            |             |             |
|---|------------|-------------|-------------|
| C | 0.79013400 | -0.12700200 | 0.36148800  |
| O | 0.17618300 | -0.84205300 | 1.46644200  |
| H | 2.51374700 | 0.73581300  | -2.18238200 |
| O | 1.54820100 | 0.80994800  | -2.22076900 |

|   |             |             |             |
|---|-------------|-------------|-------------|
| C | 0.99890700  | -0.49506000 | -2.14517600 |
| H | 1.46550100  | -1.16793600 | -2.87901500 |
| H | -0.06770800 | -0.40473100 | -2.38487100 |
| C | 1.12628800  | -1.11115400 | -0.76232900 |
| H | 0.48607000  | -1.99901000 | -0.70578500 |
| O | 2.47677400  | -1.54164400 | -0.49866200 |
| C | 3.06862500  | -0.77113200 | 0.47992700  |
| H | 3.56214900  | -1.34885800 | 1.25756500  |
| N | 4.76325200  | -0.12153700 | -0.44854000 |
| C | 4.68959800  | -0.24981600 | -1.79206500 |
| H | 4.68409800  | -1.25425200 | -2.21563800 |
| C | 4.62737100  | 0.86356500  | -2.61898600 |
| C | 4.71272500  | 2.13395800  | -2.05971000 |
| N | 4.72517000  | 3.27356300  | -2.85334400 |
| H | 4.42813900  | 4.10500800  | -2.35664700 |
| H | 4.27616800  | 3.17011500  | -3.75510000 |
| N | 4.84998900  | 2.28337700  | -0.73209700 |
| C | 4.90307400  | 1.18064600  | 0.06751600  |
| O | 5.04095000  | 1.29598900  | 1.30851600  |
| H | 0.12645900  | 0.67724200  | 0.02995800  |
| C | 2.15648600  | 0.37111700  | 0.82613700  |
| H | 2.41817100  | 1.27709300  | 0.25683900  |
| H | 2.16111000  | 0.62077700  | 1.88976600  |
| P | -1.42235200 | -0.84635100 | 1.60330500  |
| O | -1.89017500 | -1.64699300 | 2.77103900  |
| O | -1.86366700 | -1.31204900 | 0.12172500  |
| O | -1.90328600 | 0.69965800  | 1.58737800  |

|   |             |             |             |
|---|-------------|-------------|-------------|
| H | -1.97094000 | 1.06515200  | 2.48144600  |
| H | -2.82436200 | -1.34527000 | 0.00415000  |
| F | 4.53788200  | 0.72649300  | -3.97860000 |

(ii) **5Cl-3'-dCMPH**

|   |             |             |             |
|---|-------------|-------------|-------------|
| C | 0.79139900  | -0.12449800 | 0.36939900  |
| O | 0.17436900  | -0.85408800 | 1.46283200  |
| H | 2.51655100  | 0.81309600  | -2.19718100 |
| O | 1.54888100  | 0.86268900  | -2.18025500 |
| C | 1.03416000  | -0.45774600 | -2.13833600 |
| H | 1.53718200  | -1.10587000 | -2.87044900 |
| H | -0.02848900 | -0.39257900 | -2.40358900 |
| C | 1.13797200  | -1.09543600 | -0.76196200 |
| H | 0.49076000  | -1.97921400 | -0.72939200 |
| O | 2.47784200  | -1.54347600 | -0.47518200 |
| C | 3.06976500  | -0.76800700 | 0.49738800  |
| H | 3.56929500  | -1.34245800 | 1.27359600  |
| N | 4.75402100  | -0.12315100 | -0.44361100 |
| C | 4.67848800  | -0.27045100 | -1.77959800 |
| H | 4.67067200  | -1.28415900 | -2.18000900 |
| C | 4.60358400  | 0.82918100  | -2.64239400 |
| C | 4.69761600  | 2.10921200  | -2.09053000 |
| N | 4.69933200  | 3.25273600  | -2.87038700 |
| H | 4.44756400  | 4.08840200  | -2.35760000 |
| H | 4.24886500  | 3.17445600  | -3.77320900 |
| N | 4.84835600  | 2.27537400  | -0.76543200 |
| C | 4.89997000  | 1.18726700  | 0.05274500  |



|    |             |             |             |
|----|-------------|-------------|-------------|
| O  | 5.04498400  | 1.32187800  | 1.28788000  |
| H  | 0.12783000  | 0.68177900  | 0.04301300  |
| C  | 2.15435200  | 0.37189200  | 0.84650600  |
| H  | 2.41720700  | 1.28248500  | 0.28622800  |
| H  | 2.15144700  | 0.61188400  | 1.91251100  |
| P  | -1.42472300 | -0.86212200 | 1.59361600  |
| O  | -1.89592000 | -1.68256400 | 2.74612400  |
| O  | -1.85960200 | -1.30339600 | 0.10272200  |
| O  | -1.90681300 | 0.68355900  | 1.60219800  |
| H  | -1.98386600 | 1.03155200  | 2.50248900  |
| H  | -2.81972000 | -1.33127400 | -0.02072900 |
| Cl | 4.46547100  | 0.59314100  | -4.37694100 |

**(iii) 5Br-3'-dCMPH**

|   |             |             |             |
|---|-------------|-------------|-------------|
| C | 0.79715500  | -0.12275600 | 0.36614600  |
| O | 0.17678100  | -0.84932900 | 1.45961000  |
| H | 2.50924700  | 0.83331300  | -2.22187300 |
| O | 1.54158000  | 0.86862400  | -2.17721600 |
| C | 1.04724400  | -0.45953500 | -2.14004500 |
| H | 1.56745800  | -1.09927900 | -2.86773600 |
| H | -0.01393200 | -0.41164300 | -2.41513400 |
| C | 1.14631700  | -1.09624100 | -0.76219800 |
| H | 0.49765200  | -1.97895100 | -0.73070800 |
| O | 2.48359800  | -1.54747800 | -0.46737300 |
| C | 3.07327500  | -0.77033700 | 0.50433700  |
| H | 3.57145100  | -1.34231700 | 1.28321000  |
| N | 4.76076900  | -0.13046800 | -0.43998600 |

|    |             |             |             |
|----|-------------|-------------|-------------|
| C  | 4.67513200  | -0.27772700 | -1.77434000 |
| H  | 4.66715300  | -1.29148200 | -2.17382500 |
| C  | 4.58113400  | 0.82418900  | -2.63291700 |
| C  | 4.68664800  | 2.10543600  | -2.08667100 |
| N  | 4.67477100  | 3.25468100  | -2.85615800 |
| H  | 4.43814400  | 4.08648500  | -2.33010000 |
| H  | 4.20972500  | 3.18835700  | -3.75240100 |
| N  | 4.85868700  | 2.26813900  | -0.76303000 |
| C  | 4.91205500  | 1.18000300  | 0.05516500  |
| O  | 5.06508300  | 1.31497000  | 1.28869700  |
| H  | 0.13552500  | 0.68357000  | 0.03627700  |
| C  | 2.15958100  | 0.37324500  | 0.84559400  |
| H  | 2.42593400  | 1.28006200  | 0.28105400  |
| H  | 2.15353800  | 0.61819600  | 1.91048300  |
| P  | -1.42267300 | -0.85464100 | 1.58643200  |
| O  | -1.89805700 | -1.67092800 | 2.74016300  |
| O  | -1.85430400 | -1.29968900 | 0.09572900  |
| O  | -1.90240300 | 0.69179700  | 1.58915100  |
| H  | -1.98082400 | 1.04278300  | 2.48815700  |
| H  | -2.81413200 | -1.32744800 | -0.02993000 |
| Br | 4.39738100  | 0.54578600  | -4.53825100 |

(iv) **5I-3'-dCMPH**

|   |            |             |             |
|---|------------|-------------|-------------|
| C | 0.79322000 | -0.12160500 | 0.37101300  |
| O | 0.17462800 | -0.85848300 | 1.45872200  |
| H | 2.51665100 | 0.85547200  | -2.21968700 |
| O | 1.54979900 | 0.89191900  | -2.15774800 |

|   |             |             |             |
|---|-------------|-------------|-------------|
| C | 1.05381600  | -0.43591500 | -2.13632400 |
| H | 1.57749800  | -1.06886400 | -2.86769500 |
| H | -0.00600400 | -0.38500200 | -2.41642700 |
| C | 1.14518300  | -1.08596500 | -0.76405500 |
| H | 0.49430800  | -1.96734900 | -0.74394300 |
| O | 2.47926300  | -1.54317700 | -0.46556600 |
| C | 3.07015100  | -0.76685400 | 0.50653000  |
| H | 3.56934700  | -1.34114300 | 1.28313700  |
| N | 4.75323400  | -0.12400200 | -0.43896700 |
| C | 4.67691900  | -0.28122400 | -1.77207300 |
| H | 4.66998800  | -1.30154300 | -2.15524500 |
| C | 4.59129600  | 0.80996400  | -2.65224400 |
| C | 4.68950900  | 2.09493600  | -2.10432500 |
| N | 4.67808500  | 3.24705100  | -2.87163300 |
| H | 4.44938100  | 4.07755700  | -2.33993600 |
| H | 4.20457500  | 3.18954500  | -3.76414100 |
| N | 4.85614300  | 2.26911400  | -0.78112300 |
| C | 4.90482800  | 1.18884200  | 0.04693200  |
| O | 5.05414700  | 1.33434700  | 1.27956300  |
| H | 0.12957300  | 0.68557800  | 0.04729000  |
| C | 2.15456000  | 0.37357700  | 0.85435900  |
| H | 2.41962500  | 1.28427100  | 0.29585900  |
| H | 2.14739700  | 0.61126600  | 1.92093600  |
| P | -1.42463400 | -0.86845500 | 1.58640900  |
| O | -1.89764800 | -1.69885600 | 2.73103700  |
| O | -1.85654600 | -1.29731900 | 0.09103200  |
| O | -1.90754000 | 0.67689400  | 1.60736300  |

|   |             |             |             |
|---|-------------|-------------|-------------|
| H | -1.98794900 | 1.01650400  | 2.51056400  |
| H | -2.81640800 | -1.32455900 | -0.03444500 |
| I | 4.40535400  | 0.46732800  | -4.72253900 |

**14. Cartesian coordinates of products for the C<sub>5</sub>-X bond cleavage calculated at the M06-2X/ aug-cc-pVDZ level of theory in the aqueous phase.**

**(i) 5F-3'-dCMPH**

|   |             |             |             |
|---|-------------|-------------|-------------|
| C | -1.73207900 | -0.50238400 | 0.43295900  |
| O | -1.92804200 | -0.88891900 | 1.81622200  |
| H | -1.63731700 | -0.57113300 | -3.29390700 |
| O | -1.37035600 | -0.48466100 | -2.37255400 |
| C | -1.42686600 | -1.76647700 | -1.75700500 |
| H | -0.75673200 | -2.47511900 | -2.26222000 |
| H | -2.45090900 | -2.16729700 | -1.77251300 |
| C | -0.98954200 | -1.62139200 | -0.31418500 |
| H | -1.14543300 | -2.57714500 | 0.19905300  |
| O | 0.40117300  | -1.28652800 | -0.25188200 |
| C | 0.60290300  | -0.05735400 | 0.43993600  |
| H | 0.94596600  | -0.24329100 | 1.46042800  |
| N | 1.67414500  | 0.66789300  | -0.22074500 |
| C | 1.59438300  | 0.87322500  | -1.58128500 |
| H | 0.71319200  | 0.46239000  | -2.07631900 |
| C | 2.58434700  | 1.52884100  | -2.19298100 |
| C | 3.73245800  | 2.00733300  | -1.47323600 |
| N | 4.70486400  | 2.64044800  | -2.10350800 |
| H | 5.46993000  | 2.93371900  | -1.50732100 |
| H | 4.67021100  | 2.83105600  | -3.24899500 |

|   |             |             |             |
|---|-------------|-------------|-------------|
| N | 3.77928200  | 1.78714700  | -0.14564800 |
| C | 2.78597700  | 1.13726800  | 0.51280700  |
| O | 2.81501100  | 0.94460300  | 1.73658400  |
| H | -2.69589400 | -0.25874300 | -0.02390600 |
| C | -0.75060600 | 0.65391300  | 0.40733600  |
| H | -0.86575300 | 1.19729800  | -0.53568700 |
| H | -0.88818000 | 1.33720600  | 1.24873900  |
| P | -3.33740700 | -1.52018200 | 2.26076600  |
| O | -3.35661700 | -1.90311500 | 3.70082200  |
| O | -3.52060400 | -2.67349500 | 1.14685600  |
| O | -4.48400200 | -0.47432700 | 1.80250200  |
| H | -4.71119600 | 0.14683200  | 2.50981100  |
| H | -4.35449100 | -3.15862800 | 1.23161700  |
| F | 4.60007700  | 3.02078300  | -4.49654900 |

**(ii) 5Cl-3'-dCMPH**

|   |             |             |             |
|---|-------------|-------------|-------------|
| C | -1.80537400 | -0.61431400 | 0.65388300  |
| O | -2.01312300 | -1.04027200 | 2.02302500  |
| H | -1.70256000 | -0.56543100 | -3.07563900 |
| O | -1.43493600 | -0.51808800 | -2.15158400 |
| C | -1.53845700 | -1.81602100 | -1.57741600 |
| H | -0.89236700 | -2.53152600 | -2.10367700 |
| H | -2.57576500 | -2.17990500 | -1.60692800 |
| C | -1.10016700 | -1.73167300 | -0.13042400 |
| H | -1.28586900 | -2.69805100 | 0.35161400  |
| O | 0.30195400  | -1.44443300 | -0.05628700 |
| C | 0.54172500  | -0.24526600 | 0.66808200  |

|    |             |             |             |
|----|-------------|-------------|-------------|
| H  | 0.88929700  | -0.46837200 | 1.67954400  |
| N  | 1.63161400  | 0.46910500  | 0.01462700  |
| C  | 1.56498800  | 0.67713500  | -1.34195300 |
| H  | 0.67991100  | 0.28356800  | -1.84435700 |
| C  | 2.57113000  | 1.32061200  | -1.94659700 |
| C  | 3.70253800  | 1.76931600  | -1.20007100 |
| N  | 4.71419000  | 2.39138900  | -1.81013100 |
| H  | 5.50555800  | 2.69353800  | -1.26109400 |
| H  | 4.67891500  | 2.53696300  | -2.82184500 |
| N  | 3.74661500  | 1.56532800  | 0.11494500  |
| C  | 2.72941700  | 0.93208200  | 0.76759000  |
| O  | 2.73898900  | 0.75632800  | 1.98962900  |
| H  | -2.76021900 | -0.32366000 | 0.20581200  |
| C  | -0.78729600 | 0.51061400  | 0.66451600  |
| H  | -0.88579000 | 1.08828100  | -0.25991100 |
| H  | -0.90094300 | 1.16953100  | 1.52851400  |
| P  | -3.44543700 | -1.63331200 | 2.44838100  |
| O  | -3.47457900 | -2.07534400 | 3.87109600  |
| O  | -3.67719800 | -2.72999400 | 1.28760600  |
| O  | -4.54982600 | -0.52338700 | 2.04003700  |
| H  | -4.74509000 | 0.08040600  | 2.77173700  |
| H  | -4.52771200 | -3.18797100 | 1.35685000  |
| Cl | 4.11159000  | 2.57136400  | -4.97277300 |

**(iii) 5Br-3'-dCMPH**

|   |             |             |            |
|---|-------------|-------------|------------|
| C | -2.05350300 | -0.87803300 | 1.08457500 |
| O | -2.28446900 | -1.27732600 | 2.45817400 |

|   |             |             |             |
|---|-------------|-------------|-------------|
| H | -1.90330900 | -0.89508800 | -2.64058900 |
| O | -1.64881400 | -0.83208200 | -1.71380500 |
| C | -1.75851000 | -2.12040400 | -1.11962800 |
| H | -1.10497100 | -2.84388300 | -1.62541800 |
| H | -2.79507800 | -2.48584400 | -1.15650600 |
| C | -1.33907800 | -2.01112200 | 0.33134100  |
| H | -1.53337800 | -2.96811000 | 0.82854400  |
| O | 0.06208800  | -1.72451000 | 0.41820400  |
| C | 0.29387600  | -0.51531200 | 1.12974300  |
| H | 0.62076000  | -0.72535500 | 2.15079900  |
| N | 1.39743500  | 0.18559300  | 0.48739000  |
| C | 1.34192000  | 0.39917500  | -0.87027100 |
| H | 0.45535000  | 0.01405000  | -1.37654700 |
| C | 2.35605200  | 1.03235800  | -1.47367700 |
| C | 3.48350600  | 1.46378100  | -0.71004600 |
| N | 4.50686900  | 2.08273500  | -1.30786700 |
| H | 5.29638100  | 2.38284800  | -0.75550200 |
| H | 4.46176600  | 2.24654000  | -2.31130400 |
| N | 3.52505700  | 1.25135500  | 0.60351700  |
| C | 2.49892200  | 0.62377800  | 1.24736900  |
| O | 2.50532200  | 0.43471200  | 2.46816200  |
| H | -3.00041400 | -0.59325800 | 0.61635300  |
| C | -1.03250800 | 0.24423600  | 1.09102500  |
| H | -1.11535700 | 0.80592200  | 0.15537600  |
| H | -1.15794000 | 0.91849300  | 1.94147300  |
| P | -3.72258100 | -1.86463700 | 2.87104500  |
| O | -3.77893900 | -2.26582600 | 4.30502900  |

|    |             |             |             |
|----|-------------|-------------|-------------|
| O  | -3.92626000 | -2.99548900 | 1.73798600  |
| O  | -4.82374200 | -0.77304200 | 2.40821100  |
| H  | -5.04183800 | -0.15312900 | 3.11951500  |
| H  | -4.77834500 | -3.45154400 | 1.80058900  |
| Br | 3.32655900  | 2.10688200  | -4.48443500 |

(iv) **5I-3'-dCMPH**

|   |             |             |             |
|---|-------------|-------------|-------------|
| C | -2.25521900 | -1.09809100 | 1.51289900  |
| O | -2.51042400 | -1.49793600 | 2.88282500  |
| H | -2.04886900 | -1.12621700 | -2.20788500 |
| O | -1.82063100 | -1.05436200 | -1.27498400 |
| C | -1.91075000 | -2.34390900 | -0.68090600 |
| H | -1.23471800 | -3.05387500 | -1.17637100 |
| H | -2.93879300 | -2.73156400 | -0.73230700 |
| C | -1.51526500 | -2.22601500 | 0.77638300  |
| H | -1.71022100 | -3.18344600 | 1.27303000  |
| O | -0.11967500 | -1.92534900 | 0.88681000  |
| C | 0.08714800  | -0.71573000 | 1.60972500  |
| H | 0.38217300  | -0.93108500 | 2.63939300  |
| N | 1.20271100  | -0.00560900 | 1.00494600  |
| C | 1.17948200  | 0.23282900  | -0.35587000 |
| H | 0.29955500  | -0.15188400 | -0.87435700 |
| C | 2.19469800  | 0.87607800  | -0.95764200 |
| C | 3.28808000  | 1.28496800  | -0.12701700 |
| N | 4.33186900  | 1.92397900  | -0.68352100 |
| H | 5.11185000  | 2.21226200  | -0.11228200 |
| H | 4.32709300  | 2.09602700  | -1.67970000 |



|   |             |             |             |
|---|-------------|-------------|-------------|
| N | 3.31762300  | 1.05885900  | 1.18541000  |
| C | 2.28073900  | 0.41726900  | 1.79631600  |
| O | 2.26459700  | 0.20652800  | 3.01697400  |
| H | -3.19545100 | -0.82332600 | 1.02566500  |
| C | -1.24428300 | 0.03263100  | 1.53805400  |
| H | -1.31020700 | 0.58946200  | 0.59825700  |
| H | -1.39476000 | 0.70875000  | 2.38307900  |
| P | -3.95171200 | -2.09472500 | 3.26791000  |
| O | -4.03293800 | -2.49774100 | 4.70034400  |
| O | -4.12817400 | -3.22629000 | 2.13081300  |
| O | -5.05172600 | -1.01011800 | 2.78580400  |
| H | -5.28476000 | -0.39105300 | 3.49305100  |
| H | -4.97892700 | -3.68665000 | 2.17804000  |
| I | 2.41683900  | 1.46343300  | -3.77766200 |

**15. Cartesian coordinates of products for the C<sub>3</sub>–O<sub>3</sub>' bond cleavage calculated at the M06-2X/ aug-cc-pVDZ level of theory in the aqueous phase.**

**(i) 3'-dCMPH**

|   |             |             |             |
|---|-------------|-------------|-------------|
| C | -1.53173100 | 0.16864700  | -0.89298400 |
| O | -1.21408200 | -1.45580500 | 2.04079400  |
| H | -0.42355600 | -1.12115500 | -4.31147400 |
| O | -0.45086800 | -0.74670100 | -3.42460200 |
| C | -1.03596800 | -1.70377700 | -2.54951000 |
| H | -0.49866500 | -2.66091400 | -2.60575400 |
| H | -2.09196400 | -1.87754000 | -2.80495300 |
| C | -0.97742400 | -1.19336100 | -1.12234300 |
| H | -1.48731800 | -1.93319100 | -0.48287300 |

|   |             |             |             |
|---|-------------|-------------|-------------|
| O | 0.39221000  | -1.10690400 | -0.69227700 |
| C | 0.62101400  | 0.04955100  | 0.07696000  |
| H | 0.91666800  | -0.22623900 | 1.08918400  |
| N | 1.77384200  | 0.76850600  | -0.51278600 |
| C | 2.01720600  | 0.71681300  | -1.84580900 |
| H | 1.33669700  | 0.09730200  | -2.42783900 |
| C | 3.05729400  | 1.40059700  | -2.39131200 |
| C | 3.86652800  | 2.15819900  | -1.48605800 |
| N | 4.94198500  | 2.82491100  | -1.95125300 |
| H | 5.50674000  | 3.36266000  | -1.31121500 |
| H | 5.18985600  | 2.80298600  | -2.92753700 |
| N | 3.60765700  | 2.24399500  | -0.18629500 |
| C | 2.53368600  | 1.58979600  | 0.33591600  |
| O | 2.20072700  | 1.68875300  | 1.52262500  |
| H | -2.53534200 | 0.46286300  | -1.18123800 |
| C | -0.66323800 | 0.90187200  | 0.06599100  |
| H | -0.44942600 | 1.93558100  | -0.23576000 |
| H | -1.10273700 | 0.92105500  | 1.07209300  |
| P | -2.70161800 | -1.41031300 | 2.32245800  |
| O | -3.33827900 | -1.98520700 | 3.58044300  |
| O | -3.45156600 | -2.09744800 | 1.00868600  |
| O | -3.15600800 | 0.18217800  | 2.19756600  |
| H | -3.98384600 | 0.31355000  | 2.67677400  |
| H | -4.33124200 | -2.39833400 | 1.26932500  |
| H | 3.26876000  | 1.35924600  | -3.45475900 |

(ii) **5F-3'-dCMPH**

|   |             |             |             |
|---|-------------|-------------|-------------|
| C | -1.65031100 | 0.07629200  | -0.63742300 |
| O | -1.46735500 | -1.67298500 | 2.23978000  |
| H | -0.55200400 | -1.19345500 | -4.07389300 |
| O | -0.58253800 | -0.82487500 | -3.18459200 |
| C | -1.17736600 | -1.78406800 | -2.31797500 |
| H | -0.65030900 | -2.74609400 | -2.38376600 |
| H | -2.23507300 | -1.94383600 | -2.57486600 |
| C | -1.11411600 | -1.28920200 | -0.88638600 |
| H | -1.63201400 | -2.02954400 | -0.25503200 |
| O | 0.25773600  | -1.22468700 | -0.45013900 |
| C | 0.49851900  | -0.07806400 | 0.32698900  |
| H | 0.83368300  | -0.36193200 | 1.32506200  |
| N | 1.62776600  | 0.66225800  | -0.28690500 |
| C | 1.82811100  | 0.61682300  | -1.63115000 |
| H | 1.15509700  | -0.00519700 | -2.22099300 |
| C | 2.84170200  | 1.33117200  | -2.16253600 |
| C | 3.67973700  | 2.10511400  | -1.30410100 |
| N | 4.71277100  | 2.78110800  | -1.83339300 |
| H | 5.30809200  | 3.32858600  | -1.23012900 |
| H | 4.90223000  | 2.74675800  | -2.82310300 |
| N | 3.45010500  | 2.16467000  | -0.00234200 |
| C | 2.39936000  | 1.48532400  | 0.54516600  |
| O | 2.10442700  | 1.56796800  | 1.74235100  |
| H | -2.64316400 | 0.39457900  | -0.93641500 |
| C | -0.79098400 | 0.76389800  | 0.36300800  |
| H | -0.58572100 | 1.81489600  | 0.12376500  |

|   |             |             |             |
|---|-------------|-------------|-------------|
| H | -1.23207700 | 0.71801000  | 1.36783900  |
| P | -2.95800600 | -1.54926800 | 2.47931500  |
| O | -3.67843500 | -2.19495000 | 3.65474700  |
| O | -3.70511300 | -2.05126300 | 1.08262600  |
| O | -3.29472100 | 0.07695900  | 2.49664800  |
| H | -4.13446800 | 0.22298800  | 2.95029800  |
| H | -4.60846000 | -2.32263100 | 1.28894800  |
| F | 3.10755100  | 1.32168100  | -3.48946200 |

**(iii) 5Cl-3'-dCMPH**

|   |             |             |             |
|---|-------------|-------------|-------------|
| C | -1.71725300 | 0.02275100  | -0.34709600 |
| O | -1.69232200 | -1.80394900 | 2.49976800  |
| H | -0.71409400 | -1.22998600 | -3.82385600 |
| O | -0.72421500 | -0.86892600 | -2.93093800 |
| C | -1.31984600 | -1.82629500 | -2.06296400 |
| H | -0.81340300 | -2.79758300 | -2.14992200 |
| H | -2.38534700 | -1.96274300 | -2.30052200 |
| C | -1.22202600 | -1.35177100 | -0.62692300 |
| H | -1.74972000 | -2.08741400 | 0.00145200  |
| O | 0.15802100  | -1.33088300 | -0.20163900 |
| C | 0.43956000  | -0.19436100 | 0.57300900  |
| H | 0.83150800  | -0.49100100 | 1.54722300  |
| N | 1.53387200  | 0.56529100  | -0.08720800 |
| C | 1.72415400  | 0.49032200  | -1.42303900 |
| H | 1.06041800  | -0.17036600 | -1.97890300 |
| C | 2.70565200  | 1.22101800  | -2.01182200 |
| C | 3.52100000  | 2.05209900  | -1.17499400 |

|    |             |             |             |
|----|-------------|-------------|-------------|
| N  | 4.52878000  | 2.76681600  | -1.70092700 |
| H  | 5.08458200  | 3.34785700  | -1.09128600 |
| H  | 4.73233300  | 2.74287200  | -2.68805600 |
| N  | 3.30228000  | 2.13712900  | 0.13033300  |
| C  | 2.29126100  | 1.43691200  | 0.71414500  |
| O  | 2.00999300  | 1.53268700  | 1.91220900  |
| H  | -2.70263900 | 0.37489200  | -0.63229000 |
| C  | -0.84436300 | 0.64712800  | 0.68302600  |
| H  | -0.64036100 | 1.71081100  | 0.51279100  |
| H  | -1.27227700 | 0.53023700  | 1.68811500  |
| P  | -3.18952200 | -1.64104400 | 2.66408200  |
| O  | -3.98287400 | -2.25156700 | 3.81085800  |
| O  | -3.87630200 | -2.14677900 | 1.23819700  |
| O  | -3.48773400 | -0.00752300 | 2.64341200  |
| H  | -4.34078700 | 0.16437600  | 3.06178800  |
| H  | -4.79749800 | -2.38697300 | 1.39923500  |
| Cl | 2.98109200  | 1.13433700  | -3.72885700 |

**(iv) 5Br-3'-dCMPH**

|   |             |             |             |
|---|-------------|-------------|-------------|
| C | -2.03679300 | -0.13753900 | 0.11374000  |
| O | -2.01033400 | -1.98347200 | 2.94740200  |
| H | -1.01415000 | -1.35524400 | -3.36876200 |
| O | -1.03129000 | -1.00375900 | -2.47211500 |
| C | -1.63571900 | -1.96918500 | -1.61909100 |
| H | -1.13180300 | -2.94104000 | -1.71393200 |
| H | -2.70008200 | -2.09926500 | -1.86508300 |
| C | -1.54511100 | -1.51107100 | -0.17707500 |

|    |             |             |             |
|----|-------------|-------------|-------------|
| H  | -2.07893200 | -2.25176400 | 0.44023500  |
| O  | -0.16752700 | -1.49994600 | 0.25611300  |
| C  | 0.11531700  | -0.37111800 | 1.04099100  |
| H  | 0.50066500  | -0.67703200 | 2.01503200  |
| N  | 1.21667500  | 0.38811000  | 0.39172100  |
| C  | 1.41329500  | 0.32219900  | -0.94296300 |
| H  | 0.74889700  | -0.33407900 | -1.50324200 |
| C  | 2.39760300  | 1.05547400  | -1.52388500 |
| C  | 3.21542700  | 1.87615200  | -0.68031000 |
| N  | 4.23176900  | 2.59328900  | -1.18585900 |
| H  | 4.78500200  | 3.15936100  | -0.55982300 |
| H  | 4.45447400  | 2.57582200  | -2.16890900 |
| N  | 2.98915400  | 1.95174900  | 0.62535700  |
| C  | 1.97333200  | 1.25311600  | 1.20140300  |
| O  | 1.68697800  | 1.34338700  | 2.39840300  |
| H  | -3.01992800 | 0.22050300  | -0.17202100 |
| C  | -1.16451700 | 0.47661600  | 1.15048200  |
| H  | -0.95426000 | 1.54004700  | 0.98603500  |
| H  | -1.59665900 | 0.35740800  | 2.15340800  |
| P  | -3.50716700 | -1.82363700 | 3.11773700  |
| O  | -4.29578200 | -2.44272900 | 4.26319100  |
| O  | -4.19819100 | -2.32084400 | 1.69090800  |
| O  | -3.80745300 | -0.19035700 | 3.10853000  |
| H  | -4.65977800 | -0.02213500 | 3.52988200  |
| H  | -5.11858700 | -2.56311100 | 1.85338600  |
| Br | 2.69032700  | 0.95349300  | -3.41787100 |

(v) **5I-3'-dCMPH**

|   |             |             |             |
|---|-------------|-------------|-------------|
| C | -2.03074100 | -0.13827900 | 0.11415300  |
| O | -2.01558000 | -1.98432300 | 2.94986400  |
| H | -1.01019600 | -1.36290400 | -3.36757200 |
| O | -1.03174100 | -1.00799600 | -2.47236900 |
| C | -1.63376700 | -1.97273500 | -1.61689000 |
| H | -1.12915500 | -2.94428500 | -1.71108800 |
| H | -2.69841000 | -2.10420200 | -1.86106600 |
| C | -1.54160000 | -1.51296900 | -0.17542700 |
| H | -2.07697800 | -2.25182900 | 0.44276600  |
| O | -0.16409200 | -1.50411600 | 0.25813100  |
| C | 0.12080600  | -0.37474600 | 1.04198400  |
| H | 0.50647400  | -0.68089100 | 2.01579300  |
| N | 1.22175100  | 0.38429200  | 0.39215900  |
| C | 1.41411700  | 0.32480900  | -0.94322600 |
| H | 0.74349000  | -0.33162500 | -1.49565900 |
| C | 2.39569400  | 1.05725800  | -1.53785800 |
| C | 3.21220600  | 1.87518200  | -0.68479300 |
| N | 4.22932200  | 2.60059600  | -1.17978100 |
| H | 4.77601100  | 3.16370200  | -0.54532000 |
| H | 4.45638100  | 2.59902000  | -2.16204000 |
| N | 2.99187400  | 1.94703800  | 0.62311300  |
| C | 1.98016300  | 1.24679500  | 1.20196400  |
| O | 1.69848000  | 1.33355800  | 2.40064000  |
| H | -3.01278200 | 0.22174900  | -0.17281400 |
| C | -1.15855000 | 0.47374600  | 1.15222600  |
| H | -0.94750200 | 1.53727300  | 0.98955100  |

|   |             |             |             |
|---|-------------|-------------|-------------|
| H | -1.59149000 | 0.35316500  | 2.15465300  |
| P | -3.51242300 | -1.81973600 | 3.11554100  |
| O | -4.30645000 | -2.43521200 | 4.25921200  |
| O | -4.20065400 | -2.31630600 | 1.68713800  |
| O | -3.80770700 | -0.18555800 | 3.10392900  |
| H | -4.66073300 | -0.01435900 | 3.52264900  |
| H | -5.12218000 | -2.55588800 | 1.84718900  |
| I | 2.67839300  | 0.93956600  | -3.61217700 |

**16. Cartesian coordinates of products for the C-N bond cleavage calculated at the M06-2X/ aug-cc-pVDZ level of theory in the aqueous phase.**

**(i) 3'-dCMPH**

|   |             |             |             |
|---|-------------|-------------|-------------|
| C | -1.02408900 | -0.41300900 | 0.12241300  |
| O | -1.64933500 | -0.22041400 | 1.41895100  |
| H | -0.30536700 | -1.63972800 | -3.33231200 |
| O | -0.23750400 | -1.40314300 | -2.40139900 |
| C | -1.11831900 | -2.23224400 | -1.65619000 |
| H | -0.89432000 | -3.29542900 | -1.81957000 |
| H | -2.16793200 | -2.04244000 | -1.92720100 |
| C | -0.94371400 | -1.91407300 | -0.18612600 |
| H | -1.69555200 | -2.46504900 | 0.38968300  |
| O | 0.35796100  | -2.33514300 | 0.25627400  |
| C | 1.09265400  | -1.24972400 | 0.67275800  |
| H | 2.16697300  | -1.41349700 | 0.70886100  |
| N | 3.52522400  | -0.09313700 | -1.53533300 |
| C | 2.90050500  | 0.60160800  | -2.48343800 |
| H | 2.76891700  | 0.09177400  | -3.44257800 |



|   |             |             |             |
|---|-------------|-------------|-------------|
| C | 2.41531700  | 1.89252900  | -2.32999700 |
| C | 2.62593400  | 2.45757300  | -1.05530500 |
| N | 2.22136200  | 3.75205400  | -0.78613400 |
| H | 2.13988000  | 3.96973200  | 0.19863800  |
| H | 1.47204200  | 4.11694500  | -1.35826600 |
| N | 3.24606300  | 1.80935000  | -0.07727200 |
| C | 3.70076300  | 0.52883100  | -0.31379300 |
| O | 4.28452000  | -0.08958900 | 0.61399100  |
| H | -1.58224500 | 0.13998100  | -0.63879600 |
| C | 0.43346300  | 0.01849700  | 0.23066200  |
| H | 0.79029300  | 0.33782800  | -0.76098400 |
| H | 0.55826800  | 0.85220800  | 0.92856100  |
| P | -3.21093600 | 0.13961800  | 1.48897000  |
| O | -3.70465300 | 0.26022900  | 2.89070200  |
| O | -3.83979100 | -1.00923500 | 0.54468200  |
| O | -3.43657100 | 1.44711200  | 0.56076300  |
| H | -3.36709100 | 2.26728700  | 1.07082100  |
| H | -4.80078600 | -0.93834100 | 0.44793400  |
| H | 1.91026200  | 2.42684000  | -3.12950900 |

(ii) **5F-3'-dCMPH**

|   |             |             |             |
|---|-------------|-------------|-------------|
| C | -1.21202300 | -0.28981100 | 0.78234200  |
| O | -2.00453800 | -0.85757300 | 1.85742000  |
| H | 0.74378100  | 0.03456800  | -1.72585900 |
| O | -0.17673500 | 0.29892100  | -1.86814800 |
| C | -0.99608700 | -0.84552900 | -1.69674500 |
| H | -0.70973600 | -1.64652500 | -2.39270000 |

|   |             |             |             |
|---|-------------|-------------|-------------|
| H | -2.02656000 | -0.54244300 | -1.91450500 |
| C | -0.92405300 | -1.36844300 | -0.27495000 |
| H | -1.60554600 | -2.21787400 | -0.15124700 |
| O | 0.42046800  | -1.82218000 | -0.02747200 |
| C | 0.93866200  | -1.17939200 | 1.07238400  |
| H | 2.01551700  | -1.27432000 | 1.17624500  |
| N | 3.72716500  | -0.19530000 | -0.47561600 |
| C | 3.49813400  | -0.16125600 | -1.78793300 |
| H | 3.82843700  | -1.01366700 | -2.38755500 |
| C | 2.86914400  | 0.89549300  | -2.40587100 |
| C | 2.45666300  | 1.97798100  | -1.61151400 |
| N | 1.87023400  | 3.07800500  | -2.19024000 |
| H | 1.35045300  | 3.66422200  | -1.55016600 |
| H | 1.42868700  | 2.93155200  | -3.08823000 |
| N | 2.66064200  | 1.96640100  | -0.30201900 |
| C | 3.30275200  | 0.88516000  | 0.27446800  |
| O | 3.49309400  | 0.88495800  | 1.51615800  |
| H | -1.73888800 | 0.57061300  | 0.35888200  |
| C | 0.16137400  | 0.06982500  | 1.33951700  |
| H | 0.57503900  | 0.92644500  | 0.78149300  |
| H | 0.10641500  | 0.34231000  | 2.39782700  |
| P | -3.60030500 | -0.68790500 | 1.81981900  |
| O | -4.27237200 | -1.37413900 | 2.96003000  |
| O | -3.92759900 | -1.18090800 | 0.31731000  |
| O | -3.90472000 | 0.89661500  | 1.68821400  |
| H | -4.03070400 | 1.31288300  | 2.55334400  |
| H | -4.86835500 | -1.12656700 | 0.09408600  |

F 2.64296300 0.92149200 -3.75297000

**(iii) 5Cl-3'-dCMPH**

C -1.31798800 -0.29528900 0.98866200

O -2.09694100 -0.87650400 2.06641500

H 0.59200500 0.07322000 -1.58229100

O -0.33764700 0.32872100 -1.67235900

C -1.13535100 -0.83002400 -1.49775500

H -0.84777700 -1.62073700 -2.20479800

H -2.17401000 -0.54203200 -1.69670600

C -1.03532900 -1.36298500 -0.08145400

H -1.70732700 -2.21947100 0.04632300

O 0.31641100 -1.80701100 0.14373700

C 0.83883300 -1.17681100 1.24827900

H 1.91566900 -1.27581300 1.34788200

N 3.66228300 -0.18218100 -0.20081300

C 3.42271800 -0.19944300 -1.50328400

H 3.77329900 -1.06797200 -2.06765800

C 2.75999700 0.81788700 -2.17588400

C 2.34693700 1.92877500 -1.40874300

N 1.74849700 3.01470800 -1.99371500

H 1.26098800 3.62638600 -1.35282100

H 1.29733900 2.87037300 -2.88673000

N 2.55946100 1.96548800 -0.09899400

C 3.20997000 0.91572200 0.51606200

O 3.38975300 0.95092400 1.75538600

H -1.85310200 0.56642100 0.57846800

|    |             |             |             |
|----|-------------|-------------|-------------|
| C  | 0.05904600  | 0.06611500  | 1.53585500  |
| H  | 0.46234500  | 0.93014200  | 0.98165400  |
| H  | 0.01341000  | 0.32791600  | 2.59724900  |
| P  | -3.69381600 | -0.71466700 | 2.04612000  |
| O  | -4.35089800 | -1.41417000 | 3.18698900  |
| O  | -4.03326900 | -1.19643400 | 0.54264900  |
| O  | -4.00765500 | 0.86930500  | 1.93114400  |
| H  | -4.12832500 | 1.27745600  | 2.80087800  |
| H  | -4.97602600 | -1.14218700 | 0.32804700  |
| Cl | 2.49252900  | 0.74875300  | -3.90555100 |

(iv) **5Br-3'-dCMPH**

|   |             |             |             |
|---|-------------|-------------|-------------|
| C | -1.65781500 | -0.27116800 | 1.31333800  |
| O | -2.29854600 | -0.88177700 | 2.46227000  |
| H | 0.18708100  | 0.05639900  | -1.28850800 |
| O | -0.73570900 | 0.33675100  | -1.37981200 |
| C | -1.55143300 | -0.80495800 | -1.17544300 |
| H | -1.30391700 | -1.60192700 | -1.89070900 |
| H | -2.59047800 | -0.49662400 | -1.33825300 |
| C | -1.40304200 | -1.33725800 | 0.23793300  |
| H | -2.05677700 | -2.20355800 | 0.38683900  |
| O | -0.03765000 | -1.76200900 | 0.41753100  |
| C | 0.55896500  | -1.02289200 | 1.41067600  |
| H | 1.64215700  | -1.09466500 | 1.43603200  |
| N | 3.77075800  | -0.14644400 | 0.42862900  |
| C | 3.40186300  | -0.27356400 | -0.83528500 |
| H | 3.79009600  | -1.13435800 | -1.38624300 |

|    |             |             |             |
|----|-------------|-------------|-------------|
| C  | 2.55850700  | 0.62084800  | -1.48205300 |
| C  | 2.13580200  | 1.75067300  | -0.74888200 |
| N  | 1.38709700  | 2.74736300  | -1.32144900 |
| H  | 0.92821800  | 3.35657100  | -0.65677900 |
| H  | 0.83285900  | 2.50177000  | -2.13122900 |
| N  | 2.48528500  | 1.89783300  | 0.52379000  |
| C  | 3.27595700  | 0.94575100  | 1.12951100  |
| O  | 3.55441700  | 1.06473800  | 2.34470100  |
| H  | -2.27917300 | 0.54930200  | 0.94168000  |
| C  | -0.26284700 | 0.18376600  | 1.73107800  |
| H  | 0.03418700  | 1.05724500  | 1.12921200  |
| H  | -0.23470400 | 0.46969100  | 2.78731300  |
| P  | -3.89616500 | -0.79671000 | 2.59895500  |
| O  | -4.40194500 | -1.51478600 | 3.80329500  |
| O  | -4.35821900 | -1.30932100 | 1.13935000  |
| O  | -4.29502200 | 0.76936800  | 2.50611800  |
| H  | -4.34343500 | 1.18224600  | 3.38066300  |
| H  | -5.31893300 | -1.29913900 | 1.01785400  |
| Br | 2.17073100  | 0.41621200  | -3.36347400 |

(v) **5I-3'-dCMPH**

|   |             |             |             |
|---|-------------|-------------|-------------|
| C | -1.83262900 | -0.33282500 | 1.84811700  |
| O | -2.55586700 | -0.94189900 | 2.94868900  |
| H | 0.04813500  | 0.06831400  | -0.74286000 |
| O | -0.88211300 | 0.33031100  | -0.81097300 |
| C | -1.67946000 | -0.82980000 | -0.64625000 |
| H | -1.40046600 | -1.60964300 | -1.36898700 |
| H | -2.72005800 | -0.53795200 | -0.82934700 |

|   |             |             |             |
|---|-------------|-------------|-------------|
| C | -1.56268800 | -1.38489000 | 0.76074600  |
| H | -2.23050900 | -2.24515500 | 0.88324700  |
| O | -0.20698800 | -1.82892700 | 0.96417000  |
| C | 0.34630200  | -1.17185800 | 2.03737500  |
| H | 1.42555300  | -1.26653700 | 2.11073300  |
| N | 3.31569000  | -0.18370000 | 0.81990300  |
| C | 3.03731000  | -0.27279100 | -0.46928400 |
| H | 3.42026000  | -1.15099000 | -0.99666900 |
| C | 2.29862100  | 0.67536500  | -1.17543700 |
| C | 1.88277000  | 1.81441800  | -0.44596400 |
| N | 1.23826200  | 2.86786200  | -1.04473500 |
| H | 0.76731800  | 3.48813400  | -0.39915900 |
| H | 0.73641600  | 2.68089400  | -1.90261600 |
| N | 2.13301500  | 1.92154200  | 0.85475000  |
| C | 2.82067400  | 0.91909500  | 1.50275700  |
| O | 3.00120400  | 1.00043100  | 2.73889100  |
| H | -2.40280000 | 0.51869300  | 1.46475000  |
| C | -0.44566100 | 0.05739500  | 2.34833600  |
| H | -0.08110500 | 0.92926400  | 1.78076000  |
| H | -0.46125600 | 0.31834800  | 3.41090500  |
| P | -4.15441100 | -0.80499400 | 2.99999100  |
| O | -4.74920400 | -1.52658500 | 4.16099800  |
| O | -4.55164100 | -1.27628600 | 1.50754500  |
| O | -4.49716200 | 0.77492500  | 2.91617500  |
| H | -4.58462200 | 1.17282700  | 3.79459300  |
| H | -5.50237000 | -1.22477700 | 1.33089600  |
| I | 1.99096400  | 0.46137200  | -3.24435800 |
